# Supplementary material for: Women’s autonomy and utilisation of maternal healthcare services in 31 Sub-Saharan African countries: results from the demographic and health surveys, 2010–2016
Source: PubMed Central journal article supplement — BMJ Open. 2019 Mar 13;9(3):e023128. doi: 10.1136/bmjopen-2018-023128 (PMC6429737; doi:10.1136/bmjopen-2018-023128), 2019-03-13
Supplement: bmjopen-2018-023128.draft_revisions.pdf [file bmjopen-2018-023128.draft_revisions.pdf]

# BMJ Open

BMJ Open is committed to open peer review. As part of this commitment we make the peer review history of every article we publish publicly available.

When an article is published we post the peer reviewers' comments and the authors' responses online. We also post the versions of the paper that were used during peer review. These are the versions that the peer review comments apply to.

The versions of the paper that follow are the versions that were submitted during the peer review process. They are not the versions of record or the final published versions. They should not be cited or distributed as the published version of this manuscript.

BMJ Open is an open access journal and the full, final, typeset and author-corrected version of record of the manuscript is available on our site with no access controls, subscription charges or pay-per-view fees (<http://bmjopen.bmj.com>).

If you have any questions on BMJ Open's open peer review process please email [info.bmjopen@bmj.com](mailto:info.bmjopen@bmj.com)

# BMJ Open

## Women's Autonomy concerning Utilisation of Maternal Health Services in 31 sub-Saharan African Countries: Results from Demographic and Health Surveys, 2010-2016

|                               |                                                                                                                                                                                                                                                                                                          |
|-------------------------------|----------------------------------------------------------------------------------------------------------------------------------------------------------------------------------------------------------------------------------------------------------------------------------------------------------|
| Journal:                      | <i>BMJ Open</i>                                                                                                                                                                                                                                                                                          |
| Manuscript ID                 | bmjopen-2018-023128                                                                                                                                                                                                                                                                                      |
| Article Type:                 | Research                                                                                                                                                                                                                                                                                                 |
| Date Submitted by the Author: | 22-Mar-2018                                                                                                                                                                                                                                                                                              |
| Complete List of Authors:     | Chol, Chol; University of Sydney Sydney Medical School, Public Health Negin, Joel; The University of Sydney, School of Public Health, Faculty of Medicine<br>Cumming, Robert; University of Sydney, School of Public Health<br>Agho, Kingsley ; Western Sydney University, School of Science and Health, |
| Keywords:                     | Antenatal care, Autonomy, Sub-Saharan Africa, Empowerment, Skilled birth attendants, Maternal health services                                                                                                                                                                                            |
|                               |                                                                                                                                                                                                                                                                                                          |

SCHOLARONE™  
Manuscripts

Peer Review Only

1  
2  
3 **Women's Autonomy concerning Utilisation of Maternal Health Services in 31**  
4 **sub-Saharan African Countries: Results from Demographic and Health Surveys,**  
5 **2010-2016**  
6

7 Chol S Chol MPH<sup>1</sup>, Joel Negin PhD<sup>2</sup>, Robert G Cumming PhD<sup>3</sup> Kingsley E Agho,  
8 PhD<sup>4</sup>  
9

10  
11  
12  
13 <sup>1</sup>School of Public Health, The University of Sydney, Sydney, Australia. Email:  
14 cholc97@gmail.com; Tel: +61 2 90367 699  
15

16  
17 <sup>2</sup>Associate Professor, School of Public Health, The University of Sydney, Sydney,  
18 Australia. Email: joel.negin@sydney.edu.au; Tel: +61 2 9036 9262  
19

20  
21 <sup>3</sup>Professor of Epidemiology, School of Public Health, The University of Sydney,  
22 Sydney, Australia. Email: robert.cumming@sydney.edu.au; Tel: +61 2 9036 6407  
23

24  
25 <sup>4</sup>Senior Lecturer, School of Science and Health, Western Sydney University, Sydney,  
26 Australia. Email: k.agho@westernsydney.edu.au; Tel: +612 4620 3635  
27

28  
29 **Word count:** 2,514  
30  
31  
32  
33  
34  
35  
36  
37  
38  
39  
40  
41  
42  
43  
44  
45  
46  
47  
48  
49  
50  
51  
52  
53  
54  
55  
56  
57  
58  
59  
60

## ABSTRACT

### Objectives

To examine the association between women's autonomy and utilisation of maternal health services across 31 sub-Saharan Africa (SSA) countries.

### Design, setting and participants:

We analysed the most recent Demographic and Health Survey (DHS) (2010-2016). The study consisted of 194,883 married women aged 15-49 years and uses four questions related to autonomy: attitude towards domestic and sexual violence and decision making on spending of household income and major household purchases. Multilevel regression analyses that adjust for clustering and sampling weights were used to examine the association between women autonomy and utilisation of maternal health services and the adjusted estimates were produced in forest plots.

### Outcome

The primary outcomes are the utilisation of antenatal care visits ( $\geq 4$  ANC) and delivery by skilled birth attendants (SBAs).

### Results

Combined adjusted odds ratio (aOR) showed significant associations between all four measures of women's autonomy and utilisation of maternal services. Women who lived in Southern Africa region reported an association between women autonomy (decision making on spending of household income and major household purchases) and utilisation of maternal health services ( $\geq 4$  ANC visits and SBA). Women who lived in Central Africa region revealed a significant association between opposing domestic violence and use of maternal health services (aOR=1.17, 95% Confidence Interval (CI): 1.06, 1.12) for  $\geq 4$  ANC visits and aOR=1.33, 95%CI: 1.16, 1.52 for SBAs).

### Conclusion

Women's autonomy in SSA is only marginally associated with utilisation of maternal health services, with inverse associations in some countries. A better understanding of the role of women's autonomy in SSA may help the region achieve the Sustainable Development Goal (SDG-3) target of fewer than 70 maternal deaths per 100,000 livebirths by 2030. Therefore, Further research is needed in SSA to understand better why associations are weaker than in other parts of the world.

**Strengths and limitations of this study**

- We used nationally representative DHS datasets from countries across 31 SSA countries
- We used four separate measures of female autonomy.
- DHS Datasets were from cross-sectional studies which could lead to underestimation or overestimation of the association.

For peer review only

## INTRODUCTION

Understanding the relationship between women's autonomy and utilisation of maternal health services is essential if sub-Saharan Africa (SSA) is to achieve the Sustainable Development Goal (SDG-3) target of fewer than 70 maternal deaths per 100,000 livebirths by 2030.<sup>1</sup> Global MMR has fallen from 385 to 216 per 100,000 between 1990 and 2015 but the MMR for SSA overall was still 546 per 100,000 in 2015 and 56% of all maternal deaths globally occurred in SSA.<sup>1</sup> Increased utilisation of antenatal care (ANC) and skilled birth attendants (SBA) could help reduce the high maternal deaths on the continent.<sup>2-6</sup>

Examining women's autonomy is not without challenges – related to its measurement and definition.<sup>7-10</sup> Similar to several other studies conducted in developing countries, in this study, we assessed women's autonomy using four measures in the Demographic and Health Survey (DHS) questionnaires.<sup>7,9</sup> Some scholars have used the term “autonomy” interchangeably with the term “empowerment”, while others have argued that the two words differ.<sup>11-15</sup> In our study, we use the term autonomy to refer to empowerment. Autonomy or empowerment is the ability to make an independent decision, the degree to which one can manipulate the environment to control resources for one's benefit, as well as how to engage and hold accountable institutions.<sup>16-19</sup>

Most of the studies that have examined the relationship between women's autonomy and women's health were conducted in South and South-east Asia.<sup>13,14,17,20-22</sup> These studies have found that women's autonomy is essential for utilisation of maternal health services and women's well-being, but the lack of studies from SSA makes it difficult to know if these results apply to SSA.<sup>9,23-25</sup> This is a concern since SSA has the highest maternal deaths globally.<sup>1</sup> The empirical analysis reported in this paper examined the association between four measures of women's autonomy and utilisation of maternal health services across 31 SSA using DHS data collected during 2010-2016.

## METHODS

### Data source

1  
2  
3 This study is restricted to married women aged 15-49 years living with their male  
4 partners at the time the DHS surveys were conducted. DHS surveys are standardised  
5 cross-sectional datasets that are publicly available. Data are collected by National  
6 Statistics Agencies in collaboration with the United States Agency for International  
7 Development (USAID).<sup>26</sup> Details of the sampling methods used in the DHS are  
8 described elsewhere.<sup>27</sup> The results are released in publicly available DHS household  
9 datasets.  
10  
11  
12  
13

### 14 15 **Study selection and inclusion criteria**

16  
17 From the 49 SSA countries, we selected the 31 countries that had had DHS data  
18 collected during 2010-2016. We divided the 31 countries into four regions, as used by  
19 Kassebaum et al. (2014)<sup>28</sup>: Central Africa (Congo, Democratic Republic of Congo  
20 (DRC), and Gabon); Eastern Africa (Burundi, Comoros, Ethiopia, Kenya, Malawi,  
21 Mozambique, Rwanda, Tanzania, Uganda, and Zambia); Southern Africa (Lesotho,  
22 Namibia, and Zimbabwe); and Western Africa (Benin, Burkina Faso, Cameroon,  
23 Chad, Cote d'Ivoire, Gambia, Ghana, Guinea, Liberia, Mali, Niger, Nigeria, Senegal,  
24 Sierra Leone, and Togo). Note that South Africa was excluded as its latest DHS was  
25 conducted 1992. We restricted our analysis to the most recent child born in 5 years  
26 preceding each survey.  
27  
28  
29  
30  
31  
32  
33

### 34 35 **Study variables**

#### 36 37 *Outcome variables*

38  
39 We examined two key outcomes: utilisation of at least four ANC visits ( $\geq 4$  ANC) and  
40 delivery of the last child by SBA. The utilisation of SBA included births attended by  
41 doctors, midwives and village midwives; non-utilisation included births attended by  
42 traditional birth attendants, family members and other relatives.<sup>29</sup> Utilisation of ANC  
43 services was based on mothers who had at least four ANC visits as recommended by  
44 the World Health Organization (WHO).<sup>4</sup> Primary outcomes took a binary form: the  
45 recommended four or more ANC services was assigned '1', and women who reported  
46 less than the four recommended ANC services was assigned '0'. Delivery with any  
47 SBAs was categorised as '1' and delivery without SBA was categorised as '0'.  
48  
49  
50  
51  
52  
53

#### 54 55 *Explanatory variables*

1  
2  
3 We used four DHS indicators related to female autonomy in two areas: women's  
4 attitudes to sexual and domestic violence<sup>30-36</sup> and participation in decision-making  
5 (solely or jointly with the husband) on spending of household income and major  
6 household purchases.<sup>8,9,37-39</sup>  
7  
8  
9

10 Attitude to sexual violence was measured based on responses to a question that asked  
11 if beating a wife by a husband for refusing sexual intercourse with him is acceptable.  
12 We coded a woman with a score of 1 if she responded "no" (positive association with  
13 empowerment) and 0 if she responded "yes" (agreement). Attitude to domestic  
14 violence was based on responses of women to five questions in the DHS asking  
15 whether a husband was justified in beating his wife if she: goes out without telling  
16 him; neglects the children; argues with him; refuses to have sexual intercourse with  
17 him or burns the food. We coded a woman with a score of 1 if she responded no to all  
18 five questions (positive association with empowered) and 0 if she responded "yes"  
19 (agreement) to any question.  
20  
21  
22  
23  
24  
25  
26

27 Empowerment about household income was based on a question on spending of  
28 household income. Empowerment concerning decision making on major household  
29 purchases was based on a question on who decides on major household purchases. We  
30 coded the answers to these two questions as 1 (positive association with  
31 empowerment) if a woman chooses solely or jointly with the husband and 0 if the  
32 decision is made by the husband or someone else.  
33  
34  
35  
36  
37

38 We adjusted for five potential confounding factors based on previous literature in  
39 low- and middle-income countries: place of residence (urban/rural)<sup>40-43</sup>, women age at  
40 married or cohabitation<sup>44</sup>, education attainment<sup>25,44,45</sup>, wealth index<sup>25,44-46</sup>, and  
41 working status.<sup>44,45</sup>  
42  
43  
44

### 45 **Statistical analysis**

46

47 Preliminary analyses involved frequency tabulations of all selected socio-economic  
48 and demographic characteristics of women in each country. Then, univariate and  
49 multivariate logistic regression modelling was done for associations between  
50 autonomy measures and  $\geq 4$  ANC and SBA, using Generalized Linear Latent and  
51 Mixed Models (GLLAMM) with the logit link and binomial family that adjusts for  
52 DHS clustering and sampling weights.<sup>47</sup>  
53  
54  
55  
56  
57  
58  
59  
60



1  
2  
3 For multivariate analysis, a three-stage model was performed, and data were  
4 entered progressively into the model to assess the association with the study  
5 outcomes. In the first stage, the socioeconomic factors (mother's education,  
6 household wealth index and mother's working status) were entered into the  
7 baseline multivariable model to examine their association with the study outcomes,  
8 and only variables with p-values < 0.05 were retained in the model (model 1). In  
9 the second stage, individual-level factors (place of residence, mother's age at birth)  
10 were added to model 1 and, as before, those factors with p-values < 0.05 were  
11 retained (model 2). Last, the primary explanatory variables (autonomy) were added  
12 to model 2.  
13  
14  
15  
16  
17  
18  
19

20 Adjusted odds ratios (aOR) and 95% confidence interval (95% CI) were used to  
21 measure the level of association of the four explanatory variables and the two  
22 outcome variables in each of the 31 studied countries. The "metan" function in  
23 STATA was used to produce the forest plots of adjusted odds ratios and 95%  
24 confidence intervals in individual countries and pooled adjusted odds ratios for all  
25 31 countries combined and for countries in each of the four SSA regions. All  
26 analyses and plots were performed using STATA version 14.2 (Stata Corporation,  
27 College Station, TX, USA).  
28  
29  
30  
31  
32

## 33 RESULTS

34  
35 Table 1 shows the critical socio-economic and demographic characteristics of the  
36 women in our sample (n=194,883). There was considerable variation among the 31  
37 countries. Most women who live lived in rural areas were in Burundi (92%) compared  
38 to 14% in Gabon. The percentage of women who gave birth to their first child at age  
39 12-17 years was highest in Ethiopia (62%), and lowest in Rwanda (6%). The  
40 percentage of women with no education was highest in Burkina Faso (83%) and  
41 lowest in Lesotho and Zimbabwe (1%). The percentage of women who were  
42 unemployed was highest in Niger (77%) and lowest in Rwanda (14%). The three  
43 countries with the highest percentage of women having at least primary education  
44 were all in the Southern African region – Lesotho (99%), Namibia (92%) and  
45 Zimbabwe (99%) (Table 1).  
46  
47  
48  
49  
50  
51  
52  
53  
54  
55  
56  
57  
58  
59  
60

**Table 1: Socio-economic and demographic characteristics of married women aged 15-49 years living with their male partners at the time when the the Demographic and Health Surveys were conducted in 31 sub-Saharan African countries, (2010-2016).**

| sub-Saharan African regions (n=31) | Country (year of DHS) | Residency   |             | Age at first childbirth |              |             |              | Education attainment |             |                     | Work status |             |
|------------------------------------|-----------------------|-------------|-------------|-------------------------|--------------|-------------|--------------|----------------------|-------------|---------------------|-------------|-------------|
|                                    |                       | Urban       | Rural       | 30+                     | 24-29        | 18-23       | 12-17        | No education         | Primary     | Secondary or higher | Not working | Working     |
|                                    |                       | n (%)       | n (%)       | n (%)                   | n (%)        | n (%)       | n (%)        | n (%)                | n (%)       | n (%)               | n (%)       | n (%)       |
| <b>West (15)</b>                   | Benin (2011-2012)     | 3350 (40.0) | 5021 (59.9) | 238 (2.8)               | 13960 (16.7) | 4299 (51.4) | 2439 (29.14) | 6032 (72.1)          | 1372 (16.4) | 966 (11.5)          | 2577 (30.8) | 5794 (69.2) |
|                                    | Burkina Faso (2010)   | 1826 (18.0) | 8307 (81.9) | 80 (0.8)                | 675 (6.7)    | 6031 (59.5) | 3347 (33.03) | 8454 (83.5)          | 1113 (11.0) | 561 (5.5)           | 2246 (22.2) | 7886 (77.8) |
|                                    | Cameroon (2011)       | 2824 (43.2) | 3709 (56.8) | 71 (1.1)                | 584 (8.9)    | 3227 (49.4) | 2651 (40.57) | 1922 (29.4)          | 2488 (38.1) | 2123 (32.5)         | 2023 (31.0) | 4510 (69.0) |
|                                    | Chad (2014-2015)      | 1910 (18.7) | 8319 (81.3) | 68 (0.7)                | 545 (5.3)    | 3987 (38.9) | 5629 (55.03) | 6807 (66.5)          | 2383 (23.3) | 1040 (10.2)         | 5766 (56.4) | 4453 (43.6) |
|                                    | Cote d'Ivoire (2011-  | 1640 (37.9) | 2677 (62.0) | 48 (1.1)                | 396 (9.2)    | 2134 (49.4) | 1739 (40.3)  | 2858 (66.2)          | 1052 (24.4) | 407 (9.4)           | 1210 (28.0) | 3107 (72.0) |

|  |                            |                |                 |                |                |                |                |             |                  |                |                |                 |
|--|----------------------------|----------------|-----------------|----------------|----------------|----------------|----------------|-------------|------------------|----------------|----------------|-----------------|
|  | 2012)                      |                |                 |                |                |                |                |             |                  |                |                |                 |
|  | Gambia<br>2013)            | 2355<br>(48.2) | 2536<br>(51.9)  | 79 (1.6)       | 619<br>(12.7)  | 2574<br>(52.6) | 1618<br>(33.1) | 2960 (60.5) | 678<br>(13.9)    | 1252<br>(25.6) | 2555<br>(52.3) | 2335<br>(47.8)  |
|  | Ghana<br>(2014)            | 1576<br>(45.8) | 1870<br>(54.3)  | 168<br>(4.9)   | 716<br>(20.8)  | 1789<br>(51.9) | 772<br>(22.4)  | 985 (28.6)  | 642<br>(18.6)    | 1819<br>(52.8) | 649<br>(18.8)  | 2797<br>(81.2)  |
|  | Guinea<br>(2012)           | 1175<br>(25.8) | 3377<br>(74.2)  | 59 (1.3)       | 359<br>(7.9)   | 1849<br>(40.6) | 2286<br>(50.2) | 3605 (79.2) | 536<br>(11.8)    | 411 (9.0)      | 902<br>(19.8)  | 3650<br>(80.2)  |
|  | Liberia<br>(2013)          | 1763<br>(50.6) | 1721<br>(49.4)  | 30.70<br>(0.9) | 271<br>(7.8)   | 1722<br>(49.5) | 1459<br>(41.9) | 1575 (45.2) | 999.90<br>(28.7) | 908<br>(26.1)  | 1377<br>(39.5) | 2106<br>(60.5)  |
|  | Mali<br>(2012-<br>2013)    | 1284<br>(19.6) | 5269<br>(80.4)  | 109<br>(1.7)   | 594<br>(9.1)   | 2998<br>(45.7) | 2852<br>(43.5) | 5460 (83.3) | 579 (8.8)        | 515 (7.9)      | 3691<br>(56.3) | 2863<br>(43.7)  |
|  | Niger<br>(2012)            | 1089<br>(13.9) | 6718<br>(86.1)  | 57 (0.7)       | 508<br>(6.5)   | 3348<br>(43.0) | 3872<br>(49.7) | 6634 (85.1) | 785<br>(10.1)    | 380 (4.9)      | 6002<br>(76.9) | 1804<br>(23.1)  |
|  | Nigeria<br>(2013)          | 6830<br>(35.2) | 12567<br>(64.8) | 543<br>(2.8)   | 2646<br>(13.6) | 8525<br>(44.0) | 7683<br>(39.6) | 9575 (49.4) | 3679<br>(19.0)   | 6143<br>(31.7) | 6067<br>(31.3) | 13311<br>(68.7) |
|  | Senegal<br>(2010-<br>2011) | 1468<br>(36.5) | 2555<br>(63.5)  | 96 (2.4)       | 558<br>(13.9)  | 2241<br>(55.7) | 1128<br>(28.0) | 2719 (67.6) | 838<br>(20.8)    | 467<br>(11.6)  | 2225<br>(55.3) | 1799<br>(44.7)  |
|  | Sierra<br>Leone<br>(2013)  | 1704<br>(23.4) | 5571<br>(76.6)  | 110<br>(1.5)   | 777<br>(10.7)  | 3435<br>(47.2) | 2950<br>(40.6) | 5287 (72.7) | 1017<br>(14.0)   | 970<br>(13.3)  | 1641<br>(22.6) | 5626<br>(77.4)  |

|                  |                             |                |                |              |                |                |                |             |                 |                |                |                |
|------------------|-----------------------------|----------------|----------------|--------------|----------------|----------------|----------------|-------------|-----------------|----------------|----------------|----------------|
|                  | Togo<br>(2013-<br>2014)     | 1602<br>(36.2) | 2824<br>(63.8) | 132<br>(3.0) | 720<br>(16.3)  | 2523<br>(57.0) | 1050<br>(23.7) | 1789 (40.4) | 1608<br>(36.3)  | 1030<br>23.3)  | 849<br>(19.2)  | 3577<br>(80.8) |
| <b>East (10)</b> | Burundi<br>(2010)           | 359<br>(8.0)   | 4146<br>(92.0) | 77 (1.7)     | 716<br>(15.9)  | 3071<br>(68.2) | 640<br>(14.2)  | 2361 (52.4) | 1863<br>(41.4)  | 282 (6.3)      | 818<br>(18.2)  | 3687<br>(81.8) |
|                  | Comoros<br>(2012)           | 555<br>(28.6)  | 1385<br>(71.4) | 139<br>(7.1) | 405<br>(20.9)  | 830<br>(42.8)  | 567<br>(29.2)  | 841 (43.5)  | 482<br>(24.9)   | 611<br>(31.6)  | 1171<br>(60.5) | 764 (39.5)     |
|                  | Ethiopia<br>(2016)          | 882<br>(12.4)  | 6227 (87.6)    | 52 (0.7)     | 363 (5.2)      | 2223 (31.7)    | 4379 (62.4)    | 4508 (63.4) | 1995 (28.1)     | 605 (8.5)      | 5138 (72.3)    | 1971(27.7)     |
|                  | Kenya<br>(2014)             | 4481<br>(38.1) | 7284<br>(61.9) | 154<br>(1.3) | 1429<br>(12.2) | 6822<br>(58.0) | 3359<br>(28.6) | 1251 (10.6) | 64160<br>(54.5) | 4099<br>(34.8) | 1972<br>(35.3) | 3611<br>(64.7) |
|                  | Malawi<br>(2015-<br>2016)   | 1608<br>(14.4) | 9572<br>(85.6) | 72 (0.6)     | 569<br>(5.1)   | 6549<br>(58.6) | 3990<br>(35.7) | 1404 (12.6) | 7389<br>(66.1)  | 2387<br>(21.4) | 3814<br>(34.1) | 7366<br>(65.9) |
|                  | Mozambique<br>(2015)        | 800<br>(26.0)  | 2282<br>(74.0) | 46 (1.5)     | 170 (5.6)      | 995<br>(32.6)  | 1837<br>(60.3) | 884 (28.7)  | 1710<br>(55.5)  | 480<br>(15.9)  | 1877<br>(60.9) | 1206<br>(39.1) |
|                  | Rwanda<br>(2014-<br>2015)   | 794<br>(16.4)  | 4050<br>(83.6) | 161<br>(3.3) | 1262<br>(26.1) | 3107<br>(64.1) | 313<br>(6.5)   | 717 (14.8)  | 3513<br>(72.5)  | 614<br>(12.7)  | 672<br>(13.9)  | 4172<br>(86.1) |
|                  | Tanzania<br>(2015-<br>2016) | 1571<br>(27.6) | 4115<br>(72.4) | 79 (1.4)     | 528<br>(9.3)   | 3401<br>(59.9) | 1675<br>(29.5) | 1168 (20.5) | 3695<br>(65.0)  | 824<br>(14.5)  | 1283<br>(22.6) | 4403<br>(77.4) |

|                         |                                   |                |                |                |               |                |                |             |                |                |                |                |
|-------------------------|-----------------------------------|----------------|----------------|----------------|---------------|----------------|----------------|-------------|----------------|----------------|----------------|----------------|
|                         | Uganda<br>(2016)                  | 1834<br>(22.2) | 6422<br>(77.8) | 136<br>(1.7)   | 592<br>(7.2)  | 3709<br>(45.2) | 3773<br>(46.0) | 890 (10.8)  | 4975<br>(60.3) | 2392<br>(29.0) | 1746<br>(21.1) | 6510<br>(78.9) |
|                         | Zambia<br>(2013-<br>2014)         | 2694<br>(36.3) | 4730<br>(63.7) | 60 (0.8)       | 420<br>(5.7)  | 4070<br>(54.8) | 2875<br>(38.7) | 813 (11.0)  | 4170<br>(56.2) | 2435<br>(32.8) | 3397<br>(45.8) | 4026<br>(54.2) |
| <b>Central<br/>(3)</b>  | Congo,<br>Rep.<br>(2011-<br>2012) | 2764<br>(62.1) | 1690<br>(38.0) | 83 (1.9)       | 469<br>(10.5) | 2317<br>(52.0) | 1586<br>(35.6) | 319 (7.2)   | 1307<br>(29.3) | 2829<br>(63.5) | 1288<br>(28.9) | 3166<br>(71.1) |
|                         | DRC<br>(2013-<br>2014)            | 2867<br>(30.7) | 6469<br>(69.3) | 126<br>(1.3)   | 925<br>(9.9)  | 5179<br>(55.5) | 3104<br>(33.3) | 1762 (18.9) | 4035<br>(43.2) | 3539<br>(37.9) | 2277<br>(24.4) | 7058<br>(75.6) |
|                         | Gabon<br>(2012)                   | 2199<br>(85.6) | 371<br>(14.4)  | 74 (2.9)       | 294<br>(11.4) | 1261<br>(49.1) | 941<br>(36.6)  | 230 (9.0)   | 639<br>(24.9)  | 1700<br>(66.2) | 1338<br>(52.1) | 1228<br>(47.9) |
| <b>Southern<br/>(3)</b> | Lesotho<br>(2014)                 | 574<br>(28.6)  | 1434<br>(71.4) | 58 (2.9)       | 243<br>(12.1) | 1364<br>(67.9) | 343<br>(17.1)  | 20 (1.0)    | 902<br>(44.9)  | 1086<br>(54.1) | 1318<br>(65.6) | 690 (34.4)     |
|                         | Namibia<br>(2013)                 | 944<br>(53.4)  | 826<br>(46.7)  | 81 (4.6)       | 324<br>(18.3) | 934<br>(52.8)  | 431(24.<br>4)  | 136 (7.7)   | 442<br>(25.0)  | 1192<br>(67.4) | 967<br>(54.7)  | 801 (45.3)     |
|                         | Zimbabwe<br>(2015)                | 1355<br>(32.1) | 2864<br>(67.9) | 42.60<br>(1.0) | 393<br>(9.3)  | 2688<br>(63.7) | 1095<br>(26.0) | 51 (1.22)   | 1304<br>(30.9) | 2864<br>(67.9) | 2478<br>(58.8) | 1740<br>(41.3) |

1  
2  
3  
4  
5  
6  
7  
8  
9  
10  
11  
12  
13  
14  
15  
16  
17  
18  
19  
20  
21  
22  
23  
24  
25  
26  
27  
28  
29  
30  
31  
32  
33  
34  
35  
36  
37  
38  
39  
40  
41  
42  
43  
44  
45  
46  
47  
48  
49  
50  
51  
52  
53  
54  
55  
56  
57  
58  
59  
60

Figures 1-4 (antenatal care) and figures 5-8 (skilled birth attendants) summarise the meta-analysis results (ORs and 95% CI) for all 31 countries combined as well as for regions and individual countries (after adjusting for the five potential confounders).

The pooled results for all 31 countries combined showed weak (ORs ranged from 1.07 to 1.15), but statistically significant associations between all four measures of women's autonomy and utilisation of maternal services ( $\geq 4$  ANC and SBA). Associations were strongest in the Southern region: women in this region who made decisions on household income were more likely to use SBA (aOR: 1.44, 95% CI: 1.21-1.70); women in this region who made decisions on major household purchases were more likely to use  $\geq 4$  ANC (aOR: 1.37, 95% CI: 1.14-1.64) and SBA (aOR: 1.42, 95% CI: 1.16-1.74); and those to opposed sexual violence were more likely to use SBA (aOR: 1.44, 95% CI: 1.22-1.70).

Interestingly, our country analysis showed that in three countries (Chad, Mali, and Senegal), women with higher autonomy on some measures were less likely to use maternal health services. Women with higher autonomy about domestic violence were less likely to use  $\geq 4$  ANC in Chad (aOR: 0.85, 95% CI: 0.71-1.00) and Mali (aOR: 0.83, 95% CI: 0.69-0.99) (Figure 1). Women who made decisions on household income were less likely to use  $\geq 4$  ANC in Mali (aOR: 0.82, 95% CI: 0.67-1.00) (Figure 2). Women who made decisions on major household purchases were less likely to use SBA in Senegal (aOR: 0.74, 95% CI: 0.59-0.94) (Figure 7).

*Figures 1 – 8 here*

## DISCUSSION

Relevant to the current debate on how SSA will achieve the SDG-3 target by 2030,<sup>1</sup> this study examined the association between women's autonomy and usage of maternal health services across 31 SSA countries. In the pooled results for all 31 countries combined there were only weak, albeit statistically significant, associations between women's autonomy and utilisation of maternal health services. The exception was the Southern African region where three measures of women's autonomy were relatively strongly associated with the use of maternal health services. Surprisingly, the country-level analyses suggested that in Chad, Mali, and Senegal,

1  
2  
3 women with higher autonomy on some measures were less likely to use maternal  
4 health services.  
5

6  
7 Our combined pooled results for all 31 countries show that women's autonomy is  
8 associated with use of both  $\geq 4$  ANC and SBA in SSA. However, this association was  
9 weak, suggesting that many other factors other than women's empowerment affect the  
10 use of maternal health services in SSA. In a study similar to ours, Ahmed et al. used  
11 DHS data to investigate autonomy and utilisation of  $\geq 4$  ANC and SBA in 31  
12 developing countries, including 21 SSA countries.<sup>48</sup> They found weaker associations  
13 between women's empowerment and utilisation of maternal health services in SSA  
14 than in other parts of the world. For example, the pooled odds ratio for autonomy and  
15  $\geq 4$  ANC was 1.52 for all 31 countries and 1.29 in the 21 SSA countries.<sup>48</sup> Note that  
16 we used slightly different DHS measures of autonomy to Ahmed et al. We used  
17 women's attitudes to violence as well as women's participation in decisions (finance  
18 and major household purchases). Ahmed et al. only examined women's autonomy  
19 about decisions as well as their paper was published in 2010 and so used older DHS  
20 data than we did.  
21  
22  
23  
24  
25  
26  
27  
28  
29

30 Based mainly on studies in Asia, women's autonomy is considered a crucial  
31 contributor to their utilisation of maternal health services. Women's autonomy has  
32 consistently been shown to be associated with utilisation of ANC and SBA in South  
33 and Northern India,<sup>8,13</sup> and in Nepal and Indonesia where women's financial  
34 autonomy has been found to be associated with their utilisation of maternal health  
35 service.<sup>21,22</sup>  
36  
37  
38  
39  
40  
41

42 Three measures of women's autonomy were relatively strongly associated with  
43 utilisation of maternal health services in the Southern SSA region. Women who made  
44 decisions on household income, who opposed sexual violence, and who made  
45 decisions on major household purchases were nearly 50% more likely to use both  $\geq 4$   
46 ANC and SBA. Weaker associations in other African regions could be explained by  
47 differences in levels of female's education across countries in SSA. Education has  
48 been shown to be associated with utilisation of maternal health services.<sup>21,23,48-50</sup> It has  
49 also been found that female education is related to empowerment.<sup>51,52</sup> The Southern  
50 African region had the highest mean percentage of female education (at least primary  
51  
52  
53  
54  
55  
56  
57  
58  
59  
60

1  
2  
3 education) at 97 %, compared to 88% in the Central Region, 73% in the Eastern  
4 Region and 38% in the Western region. Furthermore, the three countries with highest  
5 levels of at least primary education were all in this Southern region: Lesotho and  
6 Zimbabwe (99%) and Namibia (92%). This finding raises the possibility that an  
7 underlying level of education is needed in a country to enable women's autonomy to  
8 play a role in the utilisation of maternal health services.  
9  
10  
11

12  
13 One unexpected finding in our study is that women with higher autonomy on some  
14 measures in Chad, Mali and Senegal were less likely to utilise either  $\geq 4$  ANC or SBA  
15 than women with less autonomy. These unexpected findings are consistent with some  
16 previous research in Malawi and Mali.<sup>24,53</sup> In a study in Malawi it was found that  
17 women with higher autonomy were less likely to be accompanied by their male  
18 partners to ANC services.<sup>24</sup> In Mali, Upadhyay and colleagues found that women  
19 who had higher autonomy towards sexual violence tended to have more children,  
20 perhaps because higher fertility is regarded as a sign of empowerment.<sup>53,54</sup> Another  
21 explanation for the inverse associations that we observed might be that more  
22 empowered women in Chad, Mali and Senegal might be more likely to successfully  
23 refuse to use maternal health services that they perceive to be inadequate.<sup>55-59</sup>  
24  
25  
26  
27  
28  
29  
30  
31

32 Strengths of our study are that we used nationally representative DHS surveys from  
33 countries across SSA and we used four separate measures of female autonomy. One  
34 of the limitations is that DHS surveys are cross-sectional studies where autonomy is  
35 measured after the relevant pregnancy has occurred. Longitudinal studies measuring  
36 women's autonomy before pregnancy and then following women through to the end  
37 of the pregnancy, assessing utilisation of maternal health services, would provide  
38 higher quality evidence about the causal relationship between autonomy and  $\geq 4$  ANC  
39 and SBA. Another limitation is the measurement of autonomy. Despite many  
40 definitions and measures of women's autonomy, no measure can capture its true  
41 complex meaning.<sup>9,18,21,23,44</sup> Women's autonomy remains a multifaceted concept,  
42 which varies between cultures and societies, even within the same country.<sup>7,53</sup> The  
43 DHS provides useful indicators of autonomy for comparison across countries, but  
44 further in-depth research into cultural differences of the meaning of autonomy is  
45 needed for a better understanding of women's autonomy and its association with  
46 maternal health.  
47  
48  
49  
50  
51  
52  
53  
54  
55  
56  
57  
58  
59  
60



## CONCLUSION

Our findings suggest that there are substantial variations in the relationship between women's autonomy and use of maternal health services in SSA at both regional and country level. In most parts of SSA, women's autonomy is only very weakly associated with the utilisation of maternal health services, with inverse associations in some countries. Given these weak associations, much more research on women's autonomy is needed in SSA to inform gender and health policies required to maximise utilisation of maternal health services. Understanding women's autonomy in SSA is necessary if the region is to reduce its high maternal deaths to the SDG-3 target by the year 2030.

### **Author affiliations**

<sup>1</sup>School of Public Health, The University of Sydney, Sydney, Australia.

<sup>2</sup>Associate Professor, School of Public Health, The University of Sydney, Sydney, Australia.

<sup>3</sup>Professor of Epidemiology, School of Public Health, The University of Sydney, Sydney, Australia.

<sup>4</sup>Senior Lecturer, School of Science and Health, Western Sydney University, Sydney, Australia.

### **Contributors**

All authors contributed to the study design and review of the manuscript. CSC collected the data, produced the tables and figures and wrote the first draft with vital input from KA and RGC. KA contributed significantly to the statistical analyses. CSC wrote the report. JN provided critical contributions to the paper.

### **Role of the funding**

No funding to declare.

### **Competing interests**

All authors have no competing interests to declare.

### **Ethical approval**

This study is based on publically available DHS data. The first author was granted access to the data by the MEASURE DHS/ICF International, Rockville, Maryland, USA.

## REFERENCES

1. Alkema L, Chou D, Hogan D, et al. Global, regional, and national levels and trends in maternal mortality between 1990 and 2015, with scenario-based projections to 2030: a systematic analysis. *Lancet* 2016; **387**(10017): 462-74.
2. AbouZahr C, Wardlaw T. Maternal mortality at the end of a decade: signs of progress? *Bulletin of the World Health Organization* 2001; **79**(6): 561-8.
3. UNFPA. Maternal health thematic fund annual report 2014: Surging towards the 2015 deadline. Washington DC: UNFPA, 2015. [http://www.unfpa.org/sites/default/files/pub-pdf/MHTF%20annual%20report%20for%20WEB\\_0.pdf](http://www.unfpa.org/sites/default/files/pub-pdf/MHTF%20annual%20report%20for%20WEB_0.pdf) (accessed Oct 11, 2015).
4. WHO. Antenatal care. Geneva: WHO int, 2016. [http://www.who.int/pmnch/media/publications/aonsectionIII\\_2.pdf](http://www.who.int/pmnch/media/publications/aonsectionIII_2.pdf) (accessed July 7, 2016).
5. Alam N, Hajizadeh M, Dumont A, et al. Inequalities in maternal health care utilization in sub-Saharan African countries: a multiyear and multi-country analysis. *PloS One* 2015; **10**(4): e0120922.
6. Ronsmans C, Etard J-F, Walraven G, et al. Maternal mortality and access to obstetric services in West Africa. *Tropical Medicine & International Health* 2003; **8**(10): 940-8.
7. Kishor S, Subaiya L. Understanding womens empowerment: a comparative analysis of Demographic and Health Surveys (DHS) data. Maryland: Macro International, 2008. <https://dhsprogram.com/pubs/pdf/CR20/CR20.pdf> (accessed June 10, 2017).
8. Mistry R, Galal O, Lu M. Women's autonomy and pregnancy care in rural India: A contextual analysis. *Social science & medicine* 2009; **69**(6):926-33.
9. Woldemicael G. Do women with higher autonomy seek more maternal health care? evidence from Eritrea and Ethiopia. *Health Care for Women International* 2010; **31**(7): 599-620.
10. Haque M, Islam TM, Tareque MI, Mostofa M. Women empowerment or autonomy: A comparative view in Bangladesh context. *Bangladesh e-Journal of Sociology* 2011; **8**(2):17-30.
11. Oppenheim Mason K, editor The impact of women's social position on fertility in developing countries. Sociological forum; 1987: Springer.
12. Bott S, Jejeebhoy SJ. Adolescent sexual and reproductive health in South Asia: an overview of findings from the 2000 Mumbai conference. Geneva: World Health Organization.
13. Bloom SS, Wypij D, Gupta MD. Dimensions of women's autonomy and the influence on maternal health care utilization in a north Indian city. *Demography* 2001; **38**(1): 67-78.

14. Kabeer N. Reflections on the Measurement of Women's Empowerment: In "Discussing Women's Empowerment-Theory and Practice", Sida Studies No. 3. Novum Grafiska AB, Stockholm. 2001.
15. Malhotra A, Shuler S, Boender C. Measuring women's empowerment as a variable in international development. Washington DC: World Bank, 2002. <https://siteresources.worldbank.org/INTGENDER/Resources/MalhotraSchulerBoender.pdf> (accessed April 28, 2017).
16. Dyson T, Moore M. On kinship structure, female autonomy, and demographic behavior in India. *Population and Development Review* 1983; 35-60.
17. Basu AM. Culture the status of women and demographic behaviour: illustrated with the case of India. London: Oxford University Press, 1992.
18. Kabeer N, McFadden P, Arnfred S, et al. Discussing women's empowerment - theory and practice. Stockholm: Sida studies no3, 2001. [http://www.sida.se/contentassets/51142018c739462db123fc0ad6383c4d/discussing-womens-empowerment---theory-and-practice\\_1626.pdf](http://www.sida.se/contentassets/51142018c739462db123fc0ad6383c4d/discussing-womens-empowerment---theory-and-practice_1626.pdf) (accessed Sep 17, 2015).
19. Jejeebhoy SJ, Sathar ZA. Women's autonomy in India and Pakistan: the influence of religion and region. *Population and Development Review* 2001; 27(4): 687-712.
20. Mason KO, Smith HL. Husbands' versus wives' fertility goals and use of contraception: The influence of gender context in five Asian countries. *Demography*;2000;37(3):299-311.
21. Furuta M, Salway S. Women's position within the household as a determinant of maternal health care use in Nepal. *International Family Planning Perspectives* 2006; 17-27.
22. Beegle K, Frankenberg E, Thomas D. Bargaining power within couples and use of prenatal and delivery care in Indonesia. *Stud Fam Plann* 2001; 32(2): 130-46.
23. Shimamoto K, Gipson JD. The relationship of women's status and empowerment with skilled birth attendant use in Senegal and Tanzania. *BMC Pregnancy and Childbirth* 2015; 15: 154.
24. Jennings L, Na M, Cherewick M, et al. Women's empowerment and male involvement in antenatal care: analyses of Demographic and Health Surveys (DHS) in selected African countries. *BMC Pregnancy and Childbirth*. 2014; 14(1): 297.
25. Fotso J-C, Ezech AC, Essendi H. Maternal health in resource-poor urban settings: how does women's autonomy influence the utilization of obstetric care services? *Reproductive Health* 2009; 6(1): 9.
26. DHS Program. Data collection. Available from: <https://www.dhsprogram.com/data/data-collection.cfm>.

- 1
- 2
- 3 27. Rutstein SO, Rojas G. Guide to DHS statistics. Maryland: Macro
- 4 International, 2006. [http://pdf.usaid.gov/pdf\\_docs/Pnacy778.pdf](http://pdf.usaid.gov/pdf_docs/Pnacy778.pdf) (accessed
- 5 July 29, 2017).
- 6
- 7 28. Kassebaum NL, Shackelford KA, Bertozzi-Villa A, Coggeshall MS, Geleijnse
- 8 JM, Heuton KR, et al. Global, regional, and national levels and causes of
- 9 maternal mortality during 1990–2013: a systematic analysis for the Global
- 10 Burden of Disease Study 2013. *The Lancet* 2014;**384**(9947):980-1004.
- 11
- 12 29. Graham WJ, Bell JS, Bullough CH. Can skilled attendance at delivery reduce
- 13 maternal mortality in developing countries? *Studies Health Serv Organ Policy*
- 14 2001; **17**: 97–130.
- 15
- 16 30. Garcia Moreno C. Responding to sexual violence in conflict. *Lancet* 2014;
- 17 **383**: 2033–4.
- 18
- 19 31. United Nations. Women Spotlight on Sustainable Development Goal 5:
- 20 Achieve gender equality and empower all women and girls. 2017.
- 21 [http://www.unwomen.org/en/digital-library/multimedia/2017/7/infographic-](http://www.unwomen.org/en/digital-library/multimedia/2017/7/infographic-spotlight-on-sdg-5)
- 22 [spotlight-on-sdg-5](http://www.unwomen.org/en/digital-library/multimedia/2017/7/infographic-spotlight-on-sdg-5) (accessed Sep 10, 2017).
- 23
- 24 32. POPIN (United Nations Population Information Network), UN Population
- 25 Division, and UNFPA. Report of the International Conference on Population
- 26 and Development( ICPD). 1994.
- 27 <http://www.un.org/popin/icpd/conference/offeng/poa.html> (accessed Sep 10,
- 28 2017).
- 29
- 30 33. Corroon M, Speizer IS, Fotso J-C, et al. The role of gender empowerment on
- 31 reproductive health outcomes in urban Nigeria. *Maternal & Child Health*
- 32 *Journal* 2014; **18**(1): 307-15.
- 33
- 34 34. Horn R, Puffer ES, Roesch E, et al. Women's perceptions of effects of war on
- 35 intimate partner violence and gender roles in two post-conflict West African
- 36 Countries: consequences and unexpected opportunities. *Conflict and health*
- 37 2014; **8**(1): 12-12.
- 38
- 39 35. Hatcher AM, Woollett N, Pallitto CC, et al. Bidirectional links between HIV
- 40 and intimate partner violence in pregnancy: Implications for prevention of
- 41 mother-to-child transmission. *Journal of the International AIDS Society* 2014;
- 42 **17**.
- 43
- 44 36. Flach C, Leese M, Heron J, et al. Antenatal domestic violence, maternal
- 45 mental health and subsequent child behaviour: a cohort study. *International*
- 46 *Journal of Obstetrics & Gynaecology* 2011; **118**(11): 1383-1391.
- 47
- 48 37. Joharifard S, Rulisa S, Niyonkuru F, et al. Prevalence and predictors of giving
- 49 birth in health facilities in Bugesera District, Rwanda. *BMC public health*
- 50 2012; **12**(1): 1049-1049.
- 51
- 52 38. Nigatu D, Gebremariam A, Abera M, Setegn T, Deribe K. Factors associated
- 53 with women's autonomy regarding maternal and child health care utilization in
- 54 Bale: A community based cross-sectional study. *BMC Women's Health*
- 55 2014;**14**(1).
- 56
- 57
- 58
- 59
- 60

- 1  
2  
3 39. Kamiya Y. Women's autonomy and reproductive health care utilisation:  
4 Empirical evidence from Tajikistan. *Health Policy* 2011; **102**(2): 304-313.  
5
- 6 40. Sambo LG, Kirigia JM, Ki-Zerbo G. Perceptions and viewpoints on  
7 proceedings of the fifteenth assembly of heads of state and government of the  
8 African Union debate on maternal, newborn and child health and  
9 development, 25-27 July 2010, Kampala, Uganda. *BMC Proceedings* 2011; **5**  
10 Suppl 5: S1-S.  
11
- 12 41. Zakane SA, Gustafsson LL, Tomson G, et al. Guidelines for maternal and  
13 neonatal "point of care": needs of and attitudes towards a computerized  
14 clinical decision support system in rural Burkina Faso. *Int J Med Inf* 2014;  
15 **83**(6): 459-69.  
16
- 17 42. Crowe S, Utley M, Costello A, et al. How many births in sub-Saharan Africa  
18 and South Asia will not be attended by a skilled birth attendant between 2011  
19 and 2015? *BMC Pregnancy & Childbirth* 2012; **12**: 4.  
20
- 21 43. Kalule-Sabiti I, Amoateng AY, Ngake M. The effect of socio-demographic  
22 factors on the utilization of maternal health care services in Uganda. *African*  
23 *Population Studies* 2014; **28**(1): 515-25.  
24
- 25 44. Gabrysch S, Campbell OMR. Still too far to walk: Literature review of the  
26 determinants of delivery service use. *BMC Pregnancy and Childbirth* 2009;  
27 **9**(1): 34.  
28
- 29 45. Singh K, Bloom S, Haney E, et al. Gender equality and childbirth in a health  
30 facility: Nigeria and MDG5. *African Journal of Reproductive Health* 2012;  
31 **16**(3): 122.  
32
- 33 46. Chi PC, Bulage P, Urdal H, et al. A qualitative study exploring the  
34 determinants of maternal health service uptake in post-conflict Burundi and  
35 Northern Uganda. *BMC Pregnancy and Childbirth* 2015; **15**: 18.  
36
- 37 47. Rabe-Hesketh S, Skrondal A. Multilevel and longitudinal modeling using  
38 Stata. STATA press; 2008.  
39
- 40 48. Ahmed S, Creanga AA, Gillespie DG, et al. Economic status, education and  
41 empowerment: implications for maternal health service utilization in  
42 developing countries. *PLOS ONE*, 2010; **5**(6): e11190.  
43
- 44 49. Caldwell JC. Health transition: the cultural, social and behavioural  
45 determinants of health in the Third World. *Social science &*  
46 *medicine*;1993;36(2):125-35.  
47
- 48 50. Basu AM, Stephenson R. Low levels of maternal education and the proximate  
49 determinants of childhood mortality: a little learning is not a dangerous thing.  
50 *Social science & medicine*; 2005;60(9):2011-23.  
51
- 52 51. Gakidou E, Cowling K, Lozano R, Murray CJ. Increased educational  
53 attainment and its effect on child mortality in 175 countries between 1970 and  
54 2009: a systematic analysis. *The Lancet*;2010;376(9745):959-74.  
55  
56  
57  
58  
59

- 1  
2  
3 52. Hossain B, Hoque AA. Women empowerment and natenatal care utilization in  
4 bangladesh. *The journal of Develping JAreas*; 2015;49(2):109.  
5  
6 53. Upadhyay UD, Karasek D. Women's empowerment and ideal family size: an  
7 examination of DHS empowerment measures in Sub-Saharan Africa.  
8 *International Perspectives on Sexual and Reproductive Health* 2012; 78-89.  
9  
10 54. Dyer SJ. The value of children in African countries–insights from studies on  
11 infertility. *J Psychosom Obstet Gynaecol* 2007; **28**(2): 69-77.  
12  
13 55. Chol C, Hunter C, Debru B, Haile B, Negin J, Cumming RG. Stakeholders'  
14 perspectives on facilitators of and barriers to the utilisation of and access to  
15 maternal health services in Eritrea: a qualitative study. *BMC Pregnancy and*  
16 *Childbirth*; 2018;18(1):35.  
17  
18 56. Miller S, Cordero M, Coleman A, Figueroa J, Brito-Anderson S, Dabagh R, et  
19 al. Quality of care in institutionalized deliveries: the paradox of the Dominican  
20 Republic. *International Journal of Gynecology & Obstetrics*;2003;82(1):89-  
21 103.  
22  
23 57. Thomas TN, Gausman J, Lattof SR, Wegner MN, Kearns AD, Langer A.  
24 Improved maternal health since the ICPD: 20 years of progress.  
25 *Contraception*;2014;90(6 Suppl):S32-S8.  
26  
27 58. More NS, Bapat U, Das S, Alcock G, Patil S, Porel M, et al. Community  
28 mobilization in Mumbai slums to improve perinatal care and outcomes: a  
29 cluster randomized controlled trial. *PLoS medicine*; 2012;9(7):e1001257.  
30  
31 59. Kruk ME, Leslie HH, Verguet S, et al. Quality of basic maternal care  
32 functions in health facilities of five African countries: an analysis of national  
33 health system surveys. *Lancet Global Health* 2016.  
34 [http://dx.doi.org/10.1016/S2214-109X\(16\)30180-2](http://dx.doi.org/10.1016/S2214-109X(16)30180-2)  
35  
36  
37  
38  
39  
40  
41  
42  
43  
44  
45  
46  
47  
48  
49  
50  
51  
52  
53  
54  
55  
56  
57  
58  
59  
60



## FIGURES

**Figure 1:** The association between women autonomy (opposing domestic violence) and utilisation of  $\geq 4$  ANC visits in 31 sub-Saharan African countries, 2010-2016

**Figure 2:** The association between women autonomy (decisions making on spending of household income) and utilisation of  $\geq 4$  ANC visits in 31 sub-Saharan African countries, 2010-2016

**Figure 3:** The association between women autonomy (decision making on major household purchases) and utilisation of  $\geq 4$  ANC visits in 31 sub-Saharan African countries, 2010-2016.

**Figure 4:** The association between women autonomy in opposing sexual violence and utilisation of  $\geq 4$  ANC visits in 31 sub-Saharan African countries, 2010-2016

**Figure 5:** The association between women autonomy (opposing domestic violence) and utilisation of SBAs in 31 sub-Saharan African countries, 2010-2016

**Figure 6:** The association between women autonomy (decisions making on spending of household income) and utilisation of SBAs in 31 sub-Saharan African countries, 2010-2016

**Figure 7:** The association between women autonomy (decision making on major household purchases) and utilisation of SBAs in 31 sub-Saharan African countries, 2010-2016

**Figure 8:** The association between women autonomy (opposing sexual violence) and utilisation of SBAs in 31 sub-Saharan African countries, 2010-2016



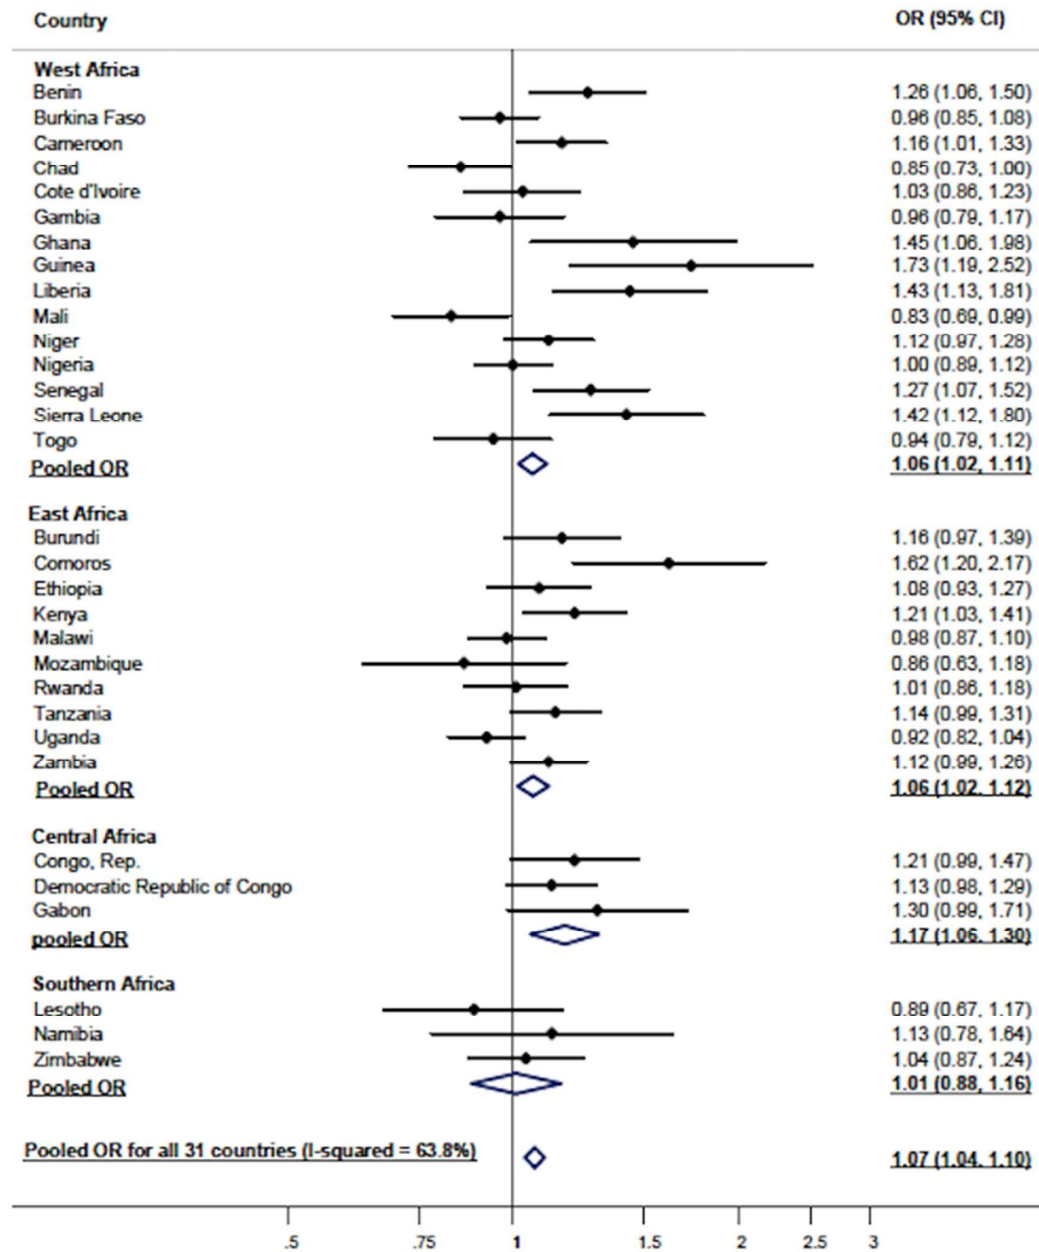

<sup>1</sup>OR = Independent variables adjusted for are: place of residence, women age at married or cohabitation, education attainment, household wealth index, and working status

**Figure 1:** The association between women autonomy (opposing domestic violence) and utilisation of  $\geq 4$  ANC visits in 31 sub-Saharan African countries, 2010-2016.

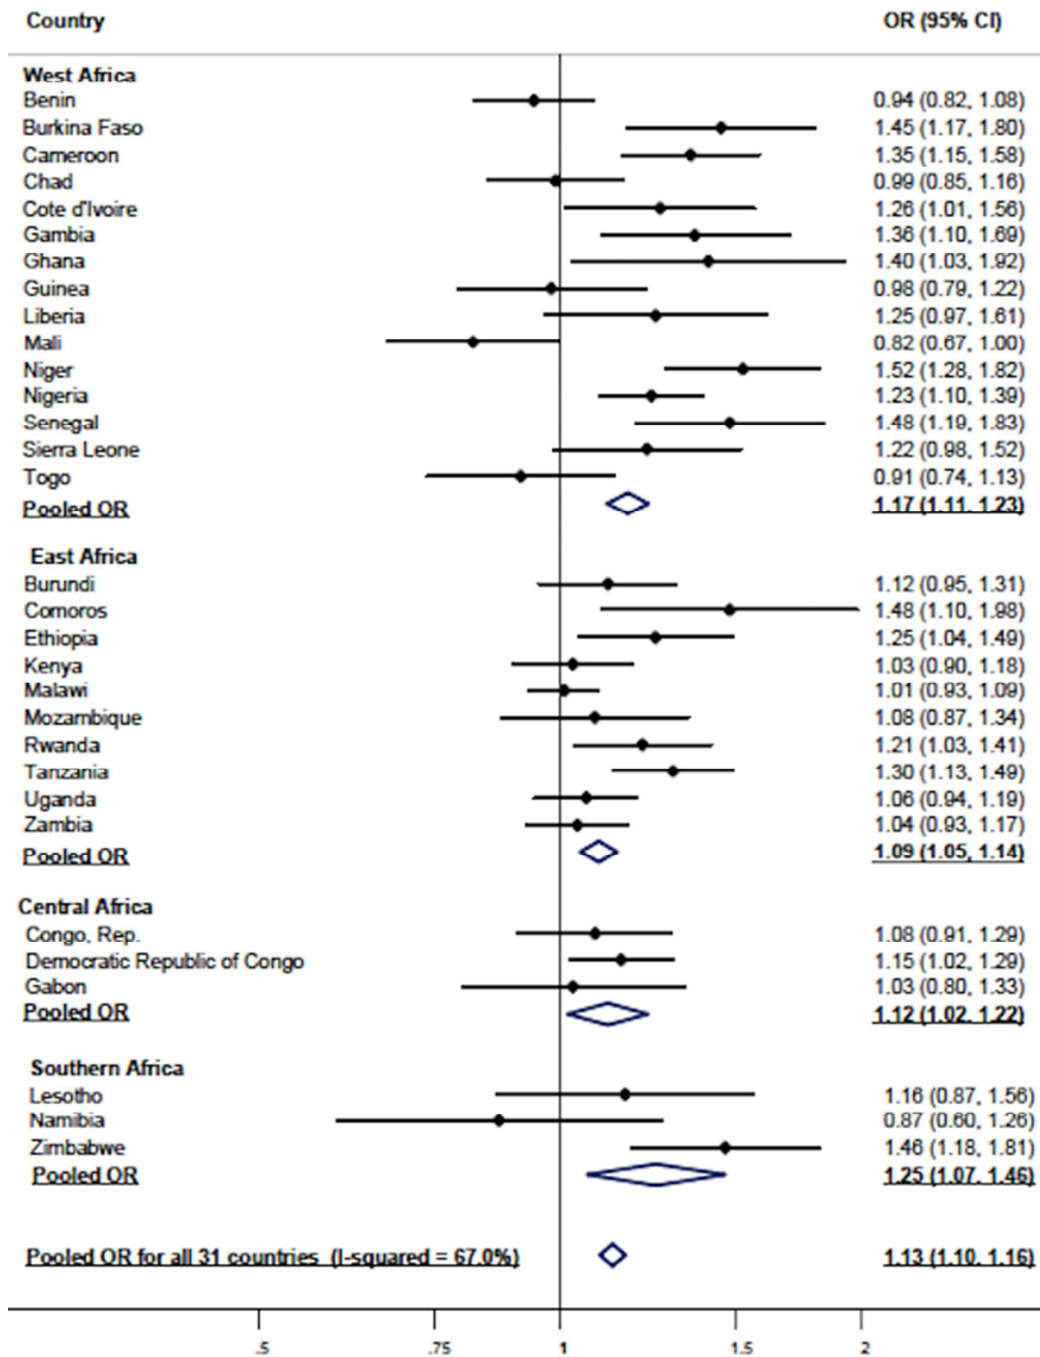

<sup>1</sup>OR = Independent variables adjusted for are: place of residence, women age at married or cohabitation, education attainment, household wealth index, and working status

**Figure 1:** The association between women autonomy (decisions making on spending of household income) and utilisation of  $\geq 4$  ANC visits in 31 sub-Saharan African countries, 2010-2016.

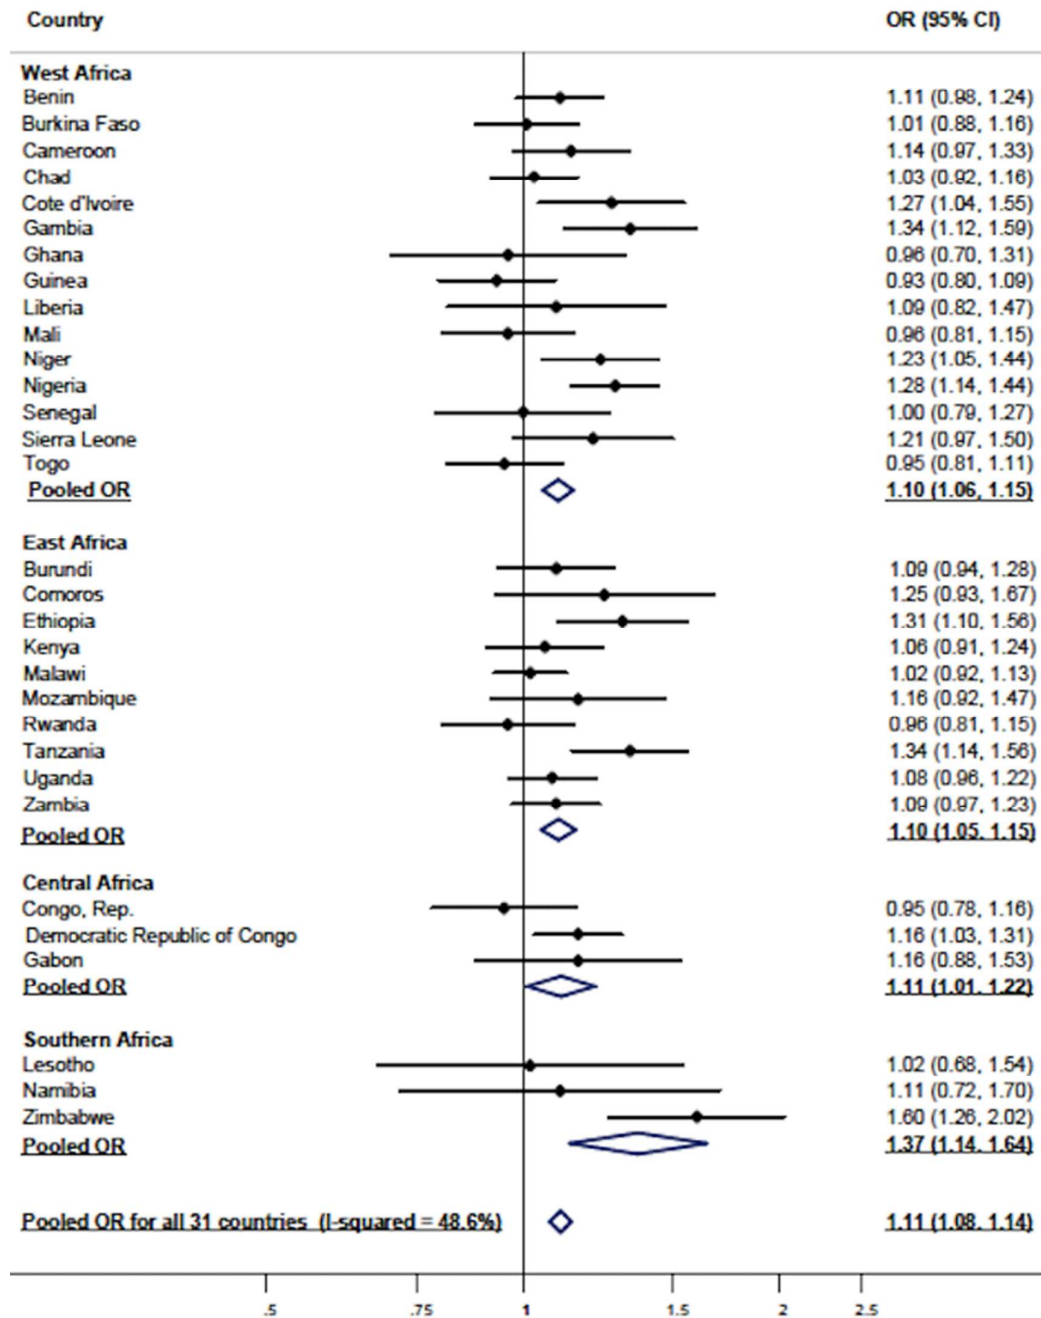

<sup>1</sup>OR = Independent variables adjusted for are: place of residence, women age at married or cohabitation, education attainment, household wealth index, and working status

**Figure 1:** The association between women autonomy (decision making on major household purchases) and utilisation of  $\geq 4$  ANC visits in 31 sub-Saharan African countries, 2010-2016.

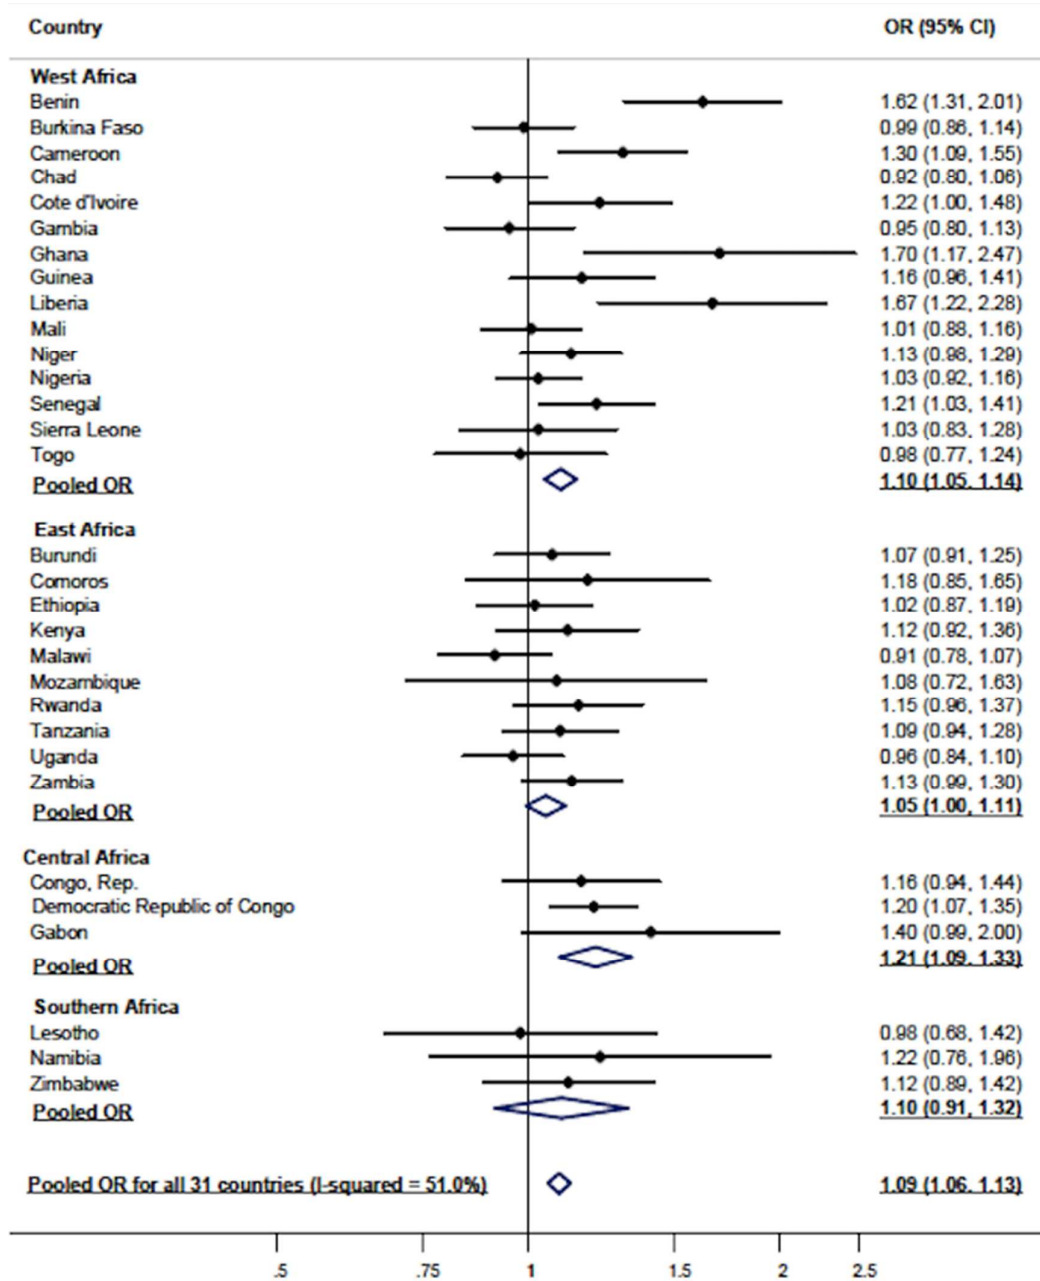

<sup>1</sup>OR = Independent variables adjusted for are: place of residence, women age at married or cohabitation, education attainment, household wealth index, and working status

**Figure 4:** The association between women autonomy in opposing sexual violence and utilisation of  $\geq 4$  ANC visits in 31 sub-Saharan African countries, 2010-2016.

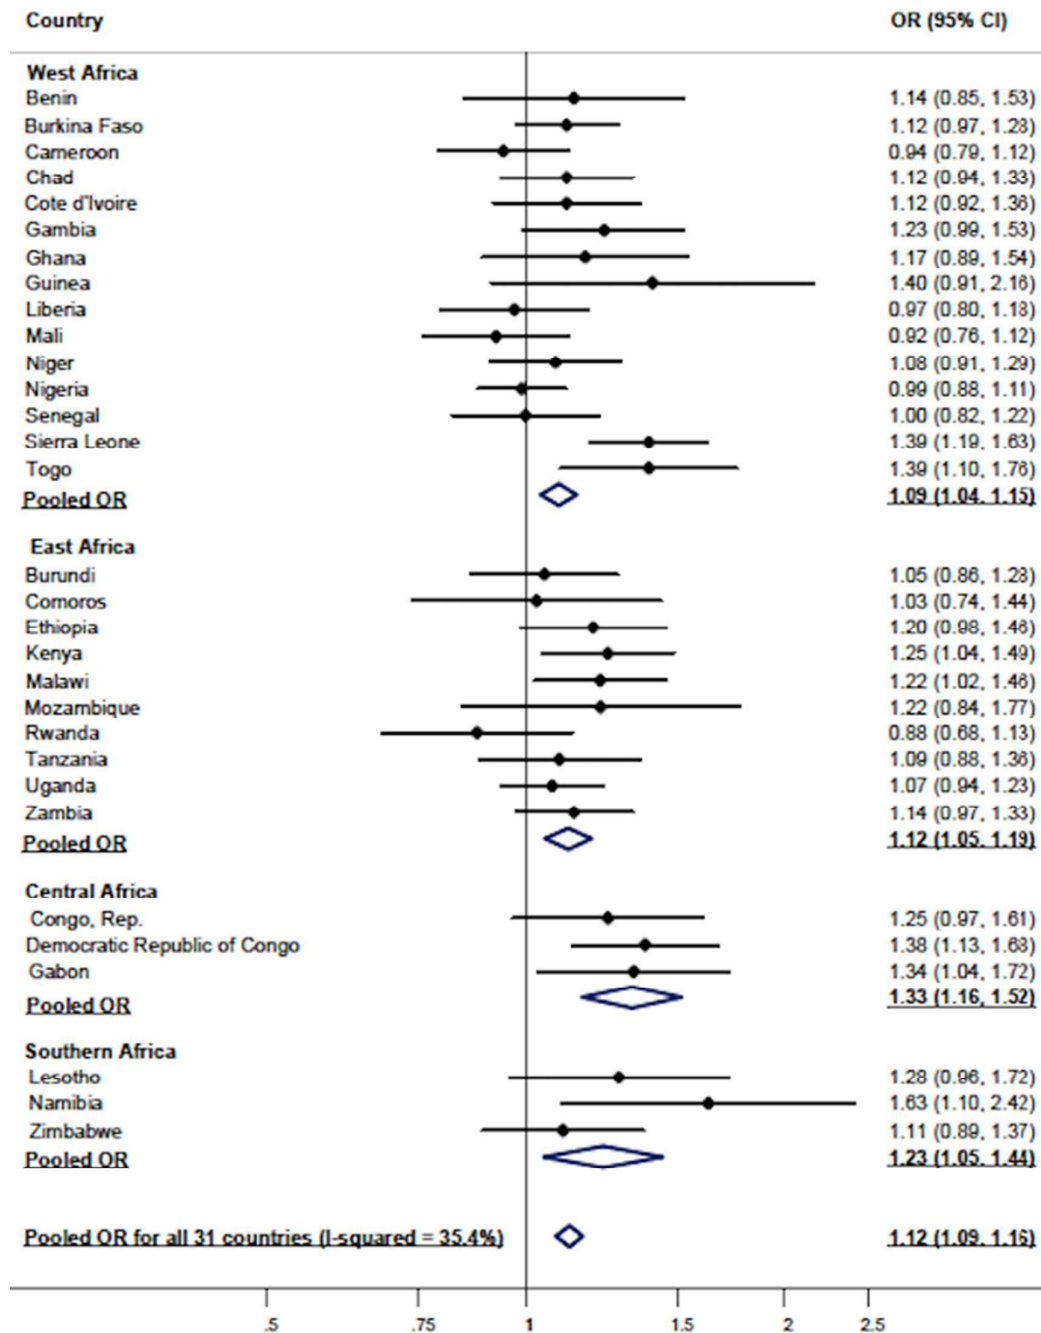

<sup>1</sup>OR = Independent variables adjusted for are: place of residence, women age at married or cohabitation, education attainment, household wealth index, and working status

**Figure 5:** The association between women autonomy (opposing domestic violence) and utilisation of SBAs in 31 sub-Saharan African countries, 2010-2016.



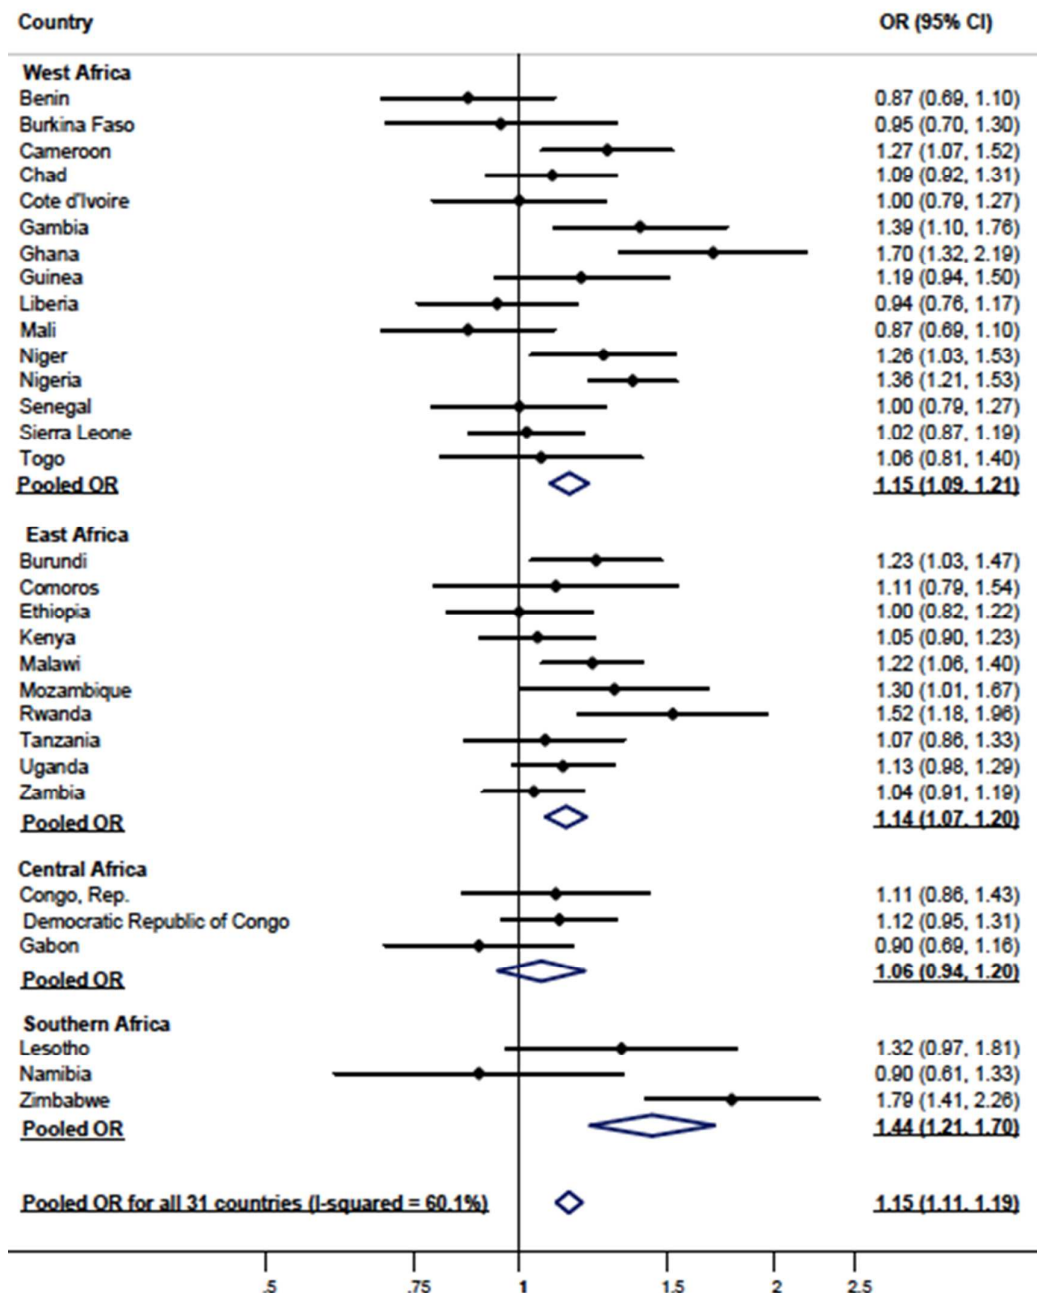

<sup>1</sup>OR = Independent variables adjusted for are: place of residence, women age at married or cohabitation, education attainment, household wealth index, and working status

**Figure 6:** The association between women autonomy (decisions making on spending of household income) and utilisation of SBAs in 31 sub-Saharan African countries, 2010-2016.

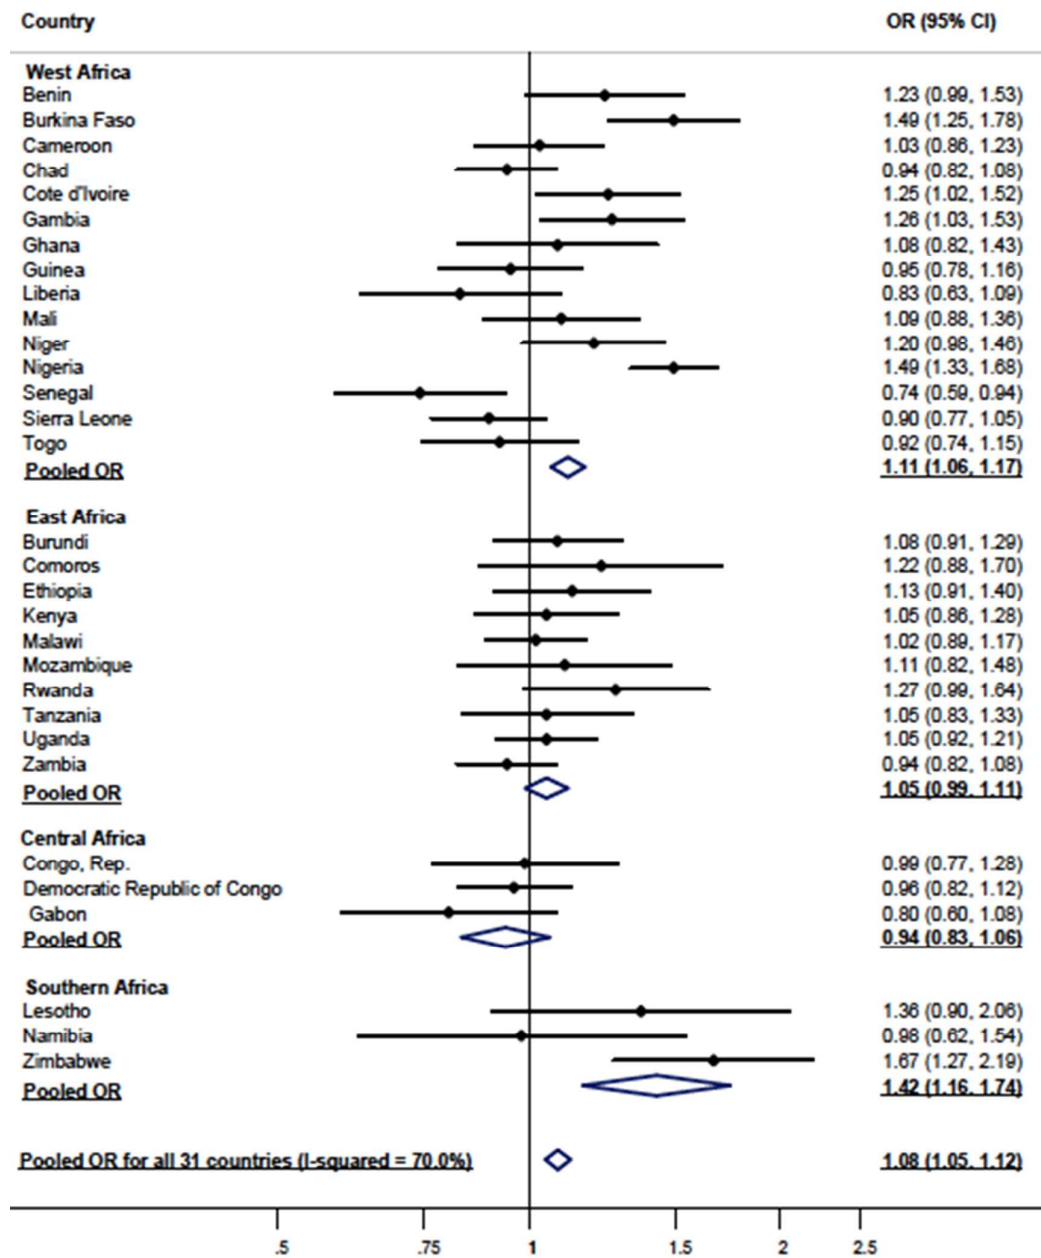

<sup>1</sup>OR = Independent variables adjusted for are: place of residence, women age at married or cohabitation, education attainment, household wealth index, and working status

**Figure 7:** The association between women autonomy (decision making on major household purchases) and utilisation of SBAs in 31 sub-Saharan African countries, 2010-2016.

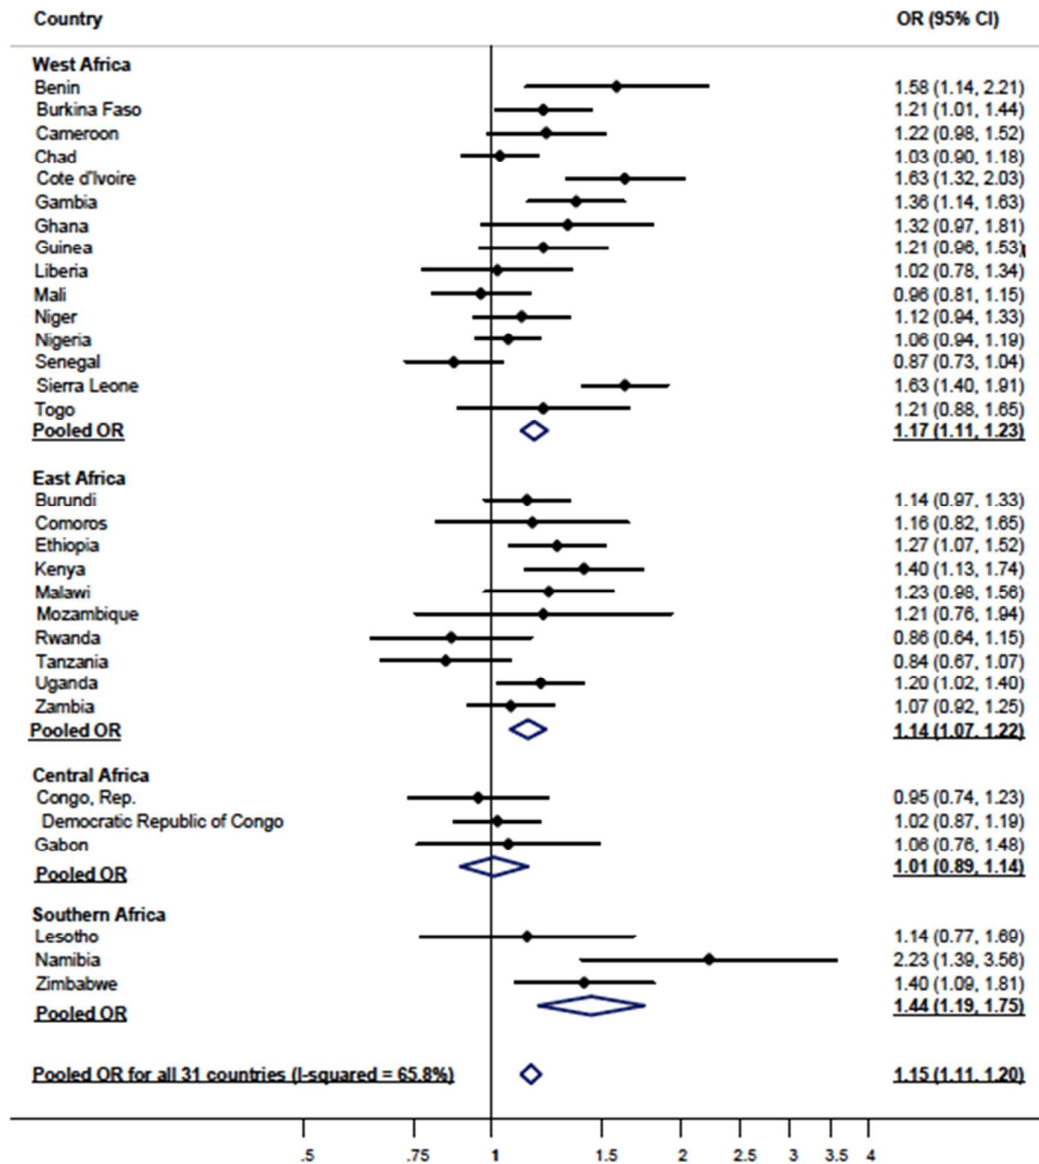

<sup>1</sup>OR = Independent variables adjusted for are: place of residence, women age at married or cohabitation, education attainment, household wealth index, and working status

**Figure 8:** The association between women autonomy (opposing sexual violence) and utilisation of SBAs in 31 sub-Saharan African countries, 2010-2016.



# BMJ Open

## Women's Autonomy and Utilisation of Maternal Healthcare Services in 31 Sub-Saharan African Countries: Results from the Demographic and Health Surveys, 2010-2016

|                                 |                                                                                                                                                                                                                                                                                                          |
|---------------------------------|----------------------------------------------------------------------------------------------------------------------------------------------------------------------------------------------------------------------------------------------------------------------------------------------------------|
| Journal:                        | <i>BMJ Open</i>                                                                                                                                                                                                                                                                                          |
| Manuscript ID                   | bmjopen-2018-023128.R1                                                                                                                                                                                                                                                                                   |
| Article Type:                   | Research                                                                                                                                                                                                                                                                                                 |
| Date Submitted by the Author:   | 22-Oct-2018                                                                                                                                                                                                                                                                                              |
| Complete List of Authors:       | Chol, Chol; University of Sydney Sydney Medical School, Public Health Negin, Joel; The University of Sydney, School of Public Health, Faculty of Medicine<br>Agho, Kingsley ; Western Sydney University, School of Science and Health,<br>Cumming, Robert; University of Sydney, School of Public Health |
| <b>Primary Subject Heading</b>: | Public health                                                                                                                                                                                                                                                                                            |
| Secondary Subject Heading:      | Health policy, Global health, Evidence based practice, Health services research, Obstetrics and gynaecology                                                                                                                                                                                              |
| Keywords:                       | Antenatal care, Autonomy, Sub-Saharan Africa, Empowerment, Skilled birth attendants, Maternal health services                                                                                                                                                                                            |
|                                 |                                                                                                                                                                                                                                                                                                          |

SCHOLARONE™  
Manuscripts

1  
2  
3 **1 Women's Autonomy and Utilisation of Maternal Healthcare Services in 31 Sub-**  
4  
5 **2 Saharan African Countries: Results from the Demographic and Health Surveys,**  
6  
7  
8 **3 2010-2016**  
9

10  
11 4 Chol Chol MPH<sup>1</sup>, Joel Negin PhD<sup>2</sup>, Kingsley Emwinyore Agho, PhD<sup>3</sup>, Robert G  
12  
13 5 Cumming PhD<sup>4</sup>  
14  
15

16  
17 6 <sup>1</sup>School of Public Health, Faculty of Medicine and Health, The University of Sydney,  
18  
19 7 Sydney, Australia. Email: cholc97@gmail.com; Tel: +61 2 903 7699  
20

21  
22 8 <sup>2</sup>Professor, Head of the School of Public Health, Faculty of Medicine and Health, The  
23  
24 9 University of Sydney, Sydney, Australia. Email: joel.negin@sydney.edu.au; Tel.: +61 2  
25  
26 10 9036 9262  
27

28  
29 11 <sup>3</sup>Senior Lecturer, School of Science and Health, Western Sydney University, Sydney,  
30  
31 12 Australia. Email: k.agho@westernsydney.edu.au; Tel: +612 4620 3635  
32  
33

34  
35 13 <sup>4</sup>Professor, School of Public Health, Faculty of Medicine and Health, The University of  
36  
37 14 Sydney, Sydney, Australia. Email: robert.cumming@sydney.edu.au; Tel: +61 2  
38  
39 15 9036 6407  
40  
41

42  
43 16  
44  
45  
46  
47  
48  
49  
50  
51  
52  
53  
54  
55  
56  
57  
58  
59  
60

1  
2  
3 **18 ABSTRACT**

4  
5 **19 Objectives**

6  
7  
8 **20** To examine the association between women's autonomy and the utilisation of maternal  
9  
10 **21** healthcare services across 31 Sub-Saharan African countries (SSA).

11  
12 **22 Design, setting, and participants:**

13  
14  
15 **23** We analysed the Demographic and Health Survey (DHS) (2010-2016) data collected from  
16  
17 **24** married women aged 15-49 years. We used four DHS measures related to women's  
18  
19 **25** autonomy: attitude towards domestic violence, attitude towards sexual violence, decision  
20  
21 **26** making on spending of household income made by the women solely or jointly with  
22  
23 **27** husbands, and decision making on major household purchases made by the women solely  
24  
25 **28** or jointly with husbands. We used multiple logistic regression analyses to examine the  
26  
27 **29** association between women's autonomy and the utilisation of maternal healthcare services  
28  
29 **30** adjusted for five potential confounders: place of residence, age at birth of the last child,  
30  
31 **31** household wealth, educational attainment, and working status. Adjusted odds ratios  
32  
33 **32** (aORs) and 95% confidence interval (95% CI) were used to produce the forest plots.

34  
35 **33 Outcome measures**

36  
37  
38 **34** The primary outcome measures were the utilisation of  $\geq 4$  antenatal care (ANC) visits and  
39  
40 **35** delivery by skilled birth attendants (SBA).

41  
42 **36 Results**

43  
44  
45 **37** Pooled results for all 31 countries (194,883 women) combined showed weak statistically  
46  
47 **38** significant associations between all four measures of women's autonomy and utilisation of  
48  
49 **39** maternal healthcare services (aORs ranged from 1.07 to 1.15). The strongest associations  
50  
51 **40** were in the Southern African region. For example, the aOR for women who made decisions  
52  
53  
54  
55  
56  
57  
58  
59  
60

1  
2  
3 41 on household income solely or jointly with husbands in relation to the use of SBAs in the  
4  
5 42 Southern African region was 1.44 (95% CI 1.21 to 1.70). Paradoxically, there were three  
6  
7 43 countries where women with higher autonomy on some measures were less likely to use  
8  
9 44 maternal healthcare services. For example, the aOR in Senegal for women who made  
10  
11 45 decisions on major household purchases solely or jointly with husbands in relation to the  
12  
13 46 use of SBAs (aOR=0.74 95% CI 0.59 to 0.94).  
14  
15  
16  
17

### 18 47 **Conclusion**

19  
20 48 Our results revealed a weak relationship between women's autonomy and the utilisation of  
21  
22 49 maternal healthcare services. More research is needed to understand why these associations  
23  
24  
25 50 are not stronger.  
26

### 27 51 **Strengths and limitations of this study**

- 28  
29  
30 52 • We used nationally representative DHS datasets from 31 SSA countries.  
31  
32 53 • We used four separate measures of women's autonomy.  
33  
34 54 • DHS data are cross-sectional, and so the direct relationship between women's  
35  
36 55 autonomy and the utilisation of maternal healthcare services cannot be determined  
37  
38  
39 56 with certainty.  
40  
41  
42  
43  
44  
45  
46  
47  
48  
49  
50  
51  
52  
53  
54  
55  
56  
57  
58  
59  
60

## 58 INTRODUCTION

59 Maternal mortality – measured as maternal mortality ratio (MMR) – remains a major  
60 concern despite the decline globally from 385 to 216 maternal deaths per 100,000 live  
61 births between 1990 and 2015.<sup>1</sup> Sixty-six percent of all maternal deaths occur in sub-  
62 Saharan Africa (SSA).<sup>1</sup> this is of concern if SSA is to achieve the Sustainable Development  
63 Goal (SDG-3) target of fewer than 70 maternal deaths per 100,000 livebirths by 2030.<sup>1</sup> The  
64 leading causes of maternal deaths in SSA are abortion, haemorrhage, hypertension,  
65 obstructed labour and sepsis.<sup>2</sup> Increasing the utilisation of antenatal care (ANC) and skilled  
66 birth attendants (SBA) could help reduce the high number of maternal deaths in SSA.<sup>3-7</sup>

67 A better understanding of the relationship between women’s autonomy and the utilisation  
68 of maternal healthcare services may contribute to reducing maternal deaths in SSA.  
69 However, examining women’s autonomy is not without challenges – especially  
70 disagreements related to its measurement and definition.<sup>8-11</sup> Similar to several other studies  
71 conducted in developing countries, in this study, we assessed women’s autonomy using  
72 four measures included in Demographic and Health Survey (DHS) questionnaires.<sup>8-11</sup>  
73 Some scholars have used the term “autonomy” and “empowerment” interchangeably, while  
74 others have argued that the two words differ.<sup>12-16</sup> In this study we use the term autonomy  
75 to indicate women’s ability to make an independent decision, to manipulate the  
76 environment and control resources, as well as to engage and hold accountable  
77 institutions.<sup>17-20</sup>

78 Most of the studies that have examined the relationship between women’s autonomy and  
79 women’s health were conducted in South and South-east Asia.<sup>14 15 18 21-23</sup> These studies

1  
2  
3 80 have found that women's autonomy is essential for utilisation of maternal healthcare  
4  
5 81 services and women's well-being. However, a recent review by Osamar and Grady found  
6  
7 82 few relevant studies from SSA, making it difficult to know if these results apply there.<sup>10</sup>  
8  
9  
10 83 <sup>24-28</sup> The aim of our study was to examine the association between four measures of  
11  
12 84 women's autonomy and utilisation of maternal healthcare services across 31 SSA countries  
13  
14  
15 85 using DHS data collected during 2010-2016.  
16  
17  
18

## 19 87 **METHODS**

### 22 88 **Data source**

23  
24  
25 89 Data from DHS surveys were used. This study is restricted to married women aged 15-49  
26  
27 90 years at the time the DHS surveys were conducted. DHS surveys are standardised cross-  
28  
29 91 sectional datasets that are publicly available. Data are collected by the National Statistics  
30  
31 92 Agencies in collaboration with the United States Agency for International Development  
32  
33 93 (USAID).<sup>29</sup>  
34  
35  
36  
37

### 38 94 **Sampling methods**

39  
40  
41 95 DHS surveys use probability sampling methods to produce representative national samples  
42  
43 96 of women aged 15-49 years. The sample results are weighted to ensure the results are  
44  
45 97 relevant to each country.<sup>30</sup> DHS surveys collect information on a wide range of topics using  
46  
47 98 mainly identical questionnaires in all countries.  
48  
49  
50

### 51 99 **Study selection and inclusion criteria**

1  
2  
3 100 From the 49 SSA countries, we selected the 31 countries that had had DHS data collected  
4  
5 101 during 2010-2016. We divided the 31 countries into four regions, as used by the Global  
6  
7 102 Burden of Disease Study<sup>2</sup>: Central Africa (Congo, Democratic Republic of Congo (DRC),  
8  
9 103 and Gabon); Eastern Africa (Burundi, Comoros, Ethiopia, Kenya, Malawi, Mozambique,  
10  
11 104 Rwanda, Tanzania, Uganda, and Zambia); Southern Africa (Lesotho, Namibia, and  
12  
13 105 Zimbabwe); and Western Africa (Benin, Burkina Faso, Cameroon, Chad, Cote d'Ivoire,  
14  
15 106 Gambia, Ghana, Guinea, Liberia, Mali, Niger, Nigeria, Senegal, Sierra Leone, and Togo).  
16  
17 107 Note that South Africa was excluded as its latest DHS was conducted in 1992. We restricted  
18  
19 108 our analysis to the most recent child born in the five years preceding each survey to improve  
20  
21 109 the accuracy of recall of use of maternal healthcare services.  
22  
23  
24  
25  
26

## 27 110 **Study variables**

### 28 29 30 111 *Outcome variables*

31  
32  
33 112 We examined two outcome measures: utilisation of at least four ANC visits ( $\geq 4$  ANC) and  
34  
35 113 delivery of the last child by SBA. The utilisation of SBA included births attended by  
36  
37 114 doctors, midwives and village midwives; non-utilisation included births attended by  
38  
39 115 traditional birth attendants, family members and other relatives.<sup>31</sup> The utilisation of ANC  
40  
41 116 services was based on mothers who had at least four ANC visits as recommended by the  
42  
43 117 World Health Organisation (WHO).<sup>5</sup> There was no data on the time of each ANC visit.  
44  
45 118 Primary outcome measures took a binary form: women with the recommended four or more  
46  
47 119 ANC services were assigned '1', and women who reported less than the four recommended  
48  
49 120 ANC services were assigned '0'. Delivery with any SBA was categorised as '1', and  
50  
51 121 delivery without SBA was categorised as '0'.  
52  
53  
54  
55  
56  
57  
58  
59  
60

1  
2  
3 122 *Explanatory variables*  
4  
5

6 123 We used four DHS indicators related to women's autonomy in two areas: women's  
7  
8 124 attitudes to sexual and domestic violence<sup>32-38</sup> and participation in decision-making (solely  
9  
10 125 or jointly with the husband) on spending of household income and major household  
11  
12  
13 126 purchases.<sup>9 10 39-41</sup>  
14  
15

16 127 Attitude to sexual violence was measured based on responses to a question that asked if  
17  
18 128 beating a wife by a husband for refusing sexual intercourse with him is acceptable. We  
19  
20 129 coded a woman with a score of 1 if she responded "no" (positive association with  
21  
22 130 autonomy) and 0 if she responded "yes" (agreement). Attitude to domestic violence was  
23  
24 131 based on responses of women to four DHS questions asking whether a husband was  
25  
26 132 justified in beating his wife if she: goes out without telling him; neglects the children;  
27  
28 133 argues with him; or burns the food. We coded a woman with a score of 1 if she responded  
29  
30 134 no to all four DHS questions (positive association with empowered) and 0 if she responded  
31  
32 135 "yes" (agreement) to any question.  
33  
34  
35  
36  
37

38 136 Autonomy about household income was based on a question on spending of household  
39  
40 137 income. Autonomy concerning decision making on major household purchases was based  
41  
42 138 on a question regarding who decides on major household purchases. We coded the answers  
43  
44 139 to these two questions as 1 (positive association with autonomy) if a woman chooses solely  
45  
46 140 or jointly with the husband and 0 if the husband alone or someone else makes the decision.  
47  
48  
49

50 141 **Potential confounding factors**  
51  
52

53 142 We adjusted for five potential confounding factors based on previous literature in low- and  
54  
55 143 middle-income countries: place of residence (urban/rural)<sup>42-45</sup>, mother's age at birth<sup>46</sup>,  
56  
57  
58  
59  
60



1  
2  
3 144 mother's educational attainment<sup>26 46 47</sup>, household wealth index<sup>26 46-48</sup>, and mother's  
4  
5 145 working status.<sup>46 47</sup>  
6  
7

## 8 146 **Statistical analysis**

9  
10  
11 147 Preliminary analyses involved frequency tabulations of all selected socio-economic and  
12  
13 148 demographic characteristics of women in each country (descriptive analysis). Then,  
14  
15 149 logistic regression modelling was done to assess the associations between autonomy  
16  
17 150 measures and outcome measures ( $\geq 4$  ANC and SBA), using Generalised Linear Latent  
18  
19 151 and Mixed Models (GLLMM) with the logit link and binomial family that adjusts for  
20  
21 152 DHS clustering and sampling weights.<sup>49</sup>  
22  
23  
24  
25

26 153 Our analysis was conducted in four stages where data were entered progressively into  
27  
28 154 the model to assess associations with the study outcomes. In model 1, we conducted  
29  
30 155 logistic regression models with each measure of autonomy and each outcome variable  
31  
32 156 ( $\geq 4$  ANC and SBA). In the second stage, to avoid collinearity, the socioeconomic factors  
33  
34 157 (mother's education, household wealth index and mother's working status) were entered  
35  
36 158 into model 1 to examine their association with the study outcomes (model 2). In the third  
37  
38 159 stage, individual-level factors (place of residence, mother's age at birth) were added to  
39  
40 160 model 2 to form model 3. Last, the primary explanatory variables (autonomy) were  
41  
42 161 added to model 3 to form the final model 4. As all five potential confounders were  
43  
44 162 significant at p-values  $< 0.05$ , they were retained in the final model.  
45  
46  
47  
48  
49

50 163 Adjusted odds ratios (aOR) and 95% confidence interval (95% CI) were used to  
51  
52 164 measure the level of association between the four explanatory autonomy variables and  
53  
54 165 the two outcome variables in each of the 31 studied countries. The "metan" function in  
55  
56  
57  
58  
59  
60

1  
2  
3 166 STATA was used to produce the forest plots of aORs and 95% CIs in individual  
4  
5 167 countries for all 31 countries combined, and for countries in each of the four SSA  
6  
7 168 regions. All analyses and plots were performed using STATA version 14.2 (Stata  
8  
9 169 Corporation, College Station, TX, USA).<sup>50</sup>

### 12 170 **Patient and Public Involvement**

15 171 We had no contact with any patients or the public for this study as we used publicly  
16  
17 172 accessible data previously collected for National Demographic and Health Surveys.

20  
21 173

## 23 174 **RESULTS**

26 175 Table 1 the shows socio-economic and demographic characteristics of the women in our  
27  
28 176 sample (n=194,883). There was considerable variation among the 31 countries. Ninety-two  
29  
30 177 percent of women surveyed in Burundi lived in rural areas compared to just 14% surveyed  
31  
32 178 in Gabon. The percentage of women who gave birth to their first child at age 12-17 years  
33  
34 179 was highest in Ethiopia (62%) and lowest in Rwanda (6%). The percentage of surveyed  
35  
36 180 women with no education was highest in Burkina Faso (83%) and lowest in Lesotho and  
37  
38 181 Zimbabwe (1%). The percentage of surveyed women who were unemployed was highest  
39  
40 182 in Niger (77%) and lowest in Rwanda (14%). The three countries with the highest  
41  
42 183 percentage of surveyed women having at least primary education were all in the Southern  
43  
44 184 African region – Lesotho (99%), Namibia (92%) and Zimbabwe (99%).

1  
2  
3  
4  
5  
6 **1 Table 1: Socio-economic and demographic characteristics of surveyed married women aged 15-49 years living with their male**  
7  
8 **2 partners. Data from Demographic and Health Surveys conducted in 31 sub-Saharan Africa countries, (2010-2016).**  
9

| sub-Saharan African regions (n=31) | Country (year of DHS) | Residency   |             | Age at first childbirth |              |             |              | Educational attainment |             |                     | Work status |             |
|------------------------------------|-----------------------|-------------|-------------|-------------------------|--------------|-------------|--------------|------------------------|-------------|---------------------|-------------|-------------|
|                                    |                       | Urban       | Rural       | 30+                     | 24-29        | 18-23       | 12-17        | No education           | Primary     | Secondary or higher | Not working | Working     |
|                                    |                       | n (%)       | n (%)       | n (%)                   | n (%)        | n (%)       | n (%)        | n (%)                  | n (%)       | n (%)               | n (%)       | n (%)       |
| <b>West (15)</b>                   | Benin (2011-2012)     | 3350 (40.1) | 5021 (59.9) | 238 (2.8)               | 13960 (16.7) | 4299 (51.4) | 2439 (29.14) | 6032 (72.1)            | 1372 (16.4) | 966 (11.5)          | 2577 (30.8) | 5794 (69.2) |
|                                    | Burkina Faso (2010)   | 1826 (18.1) | 8307 (81.9) | 80 (0.8)                | 675 (6.7)    | 6031 (59.5) | 3347 (33.03) | 8454 (83.5)            | 1113 (11.0) | 561 (5.5)           | 2246 (22.2) | 7886 (77.8) |
|                                    | Cameroon (2011)       | 2824 (43.2) | 3709 (56.8) | 71 (1.1)                | 584 (8.9)    | 3227 (49.4) | 2651 (40.57) | 1922 (29.4)            | 2488 (38.1) | 2123 (32.5)         | 2023 (31.0) | 4510 (69.0) |

|                           |                |                |                |            |                |                 |             |                  |             |                |                |
|---------------------------|----------------|----------------|----------------|------------|----------------|-----------------|-------------|------------------|-------------|----------------|----------------|
| Chad (2014-2015)          | 1910<br>(18.7) | 8319<br>(81.3) | 68<br>(0.7)    | 545 (5.3)  | 3987<br>(38.9) | 5629<br>(55.03) | 6807 (66.5) | 2383<br>(23.3)   | 1040 (10.2) | 5766<br>(56.4) | 4453<br>(43.6) |
| Cote d'Ivoire (2011-2012) | 1640<br>(37.9) | 2677<br>(62.0) | 48<br>(1.1)    | 396 (9.2)  | 2134<br>(49.4) | 1739<br>(40.3)  | 2858 (66.2) | 1052<br>(24.4)   | 407 (9.4)   | 1210<br>(28.0) | 3107<br>(72.0) |
| Gambia (2013)             | 2355<br>(48.2) | 2536<br>(51.9) | 79<br>(1.6)    | 619 (12.7) | 2574<br>(52.6) | 1618<br>(33.1)  | 2960 (60.5) | 678 (13.9)       | 1252 (25.6) | 2555<br>(52.3) | 2335<br>(47.8) |
| Ghana (2014)              | 1576<br>(45.8) | 1870<br>(54.3) | 168<br>(4.9)   | 716 (20.8) | 1789<br>(51.9) | 772 (22.4)      | 985 (28.6)  | 642 (18.6)       | 1819 (52.8) | 649<br>(18.8)  | 2797<br>(81.2) |
| Guinea (2012)             | 1175<br>(25.8) | 3377<br>(74.2) | 59<br>(1.3)    | 359 (7.9)  | 1849<br>(40.6) | 2286<br>(50.2)  | 3605 (79.2) | 536 (11.8)       | 411 (9.0)   | 902<br>(19.8)  | 3650<br>(80.2) |
| Liberia (2013)            | 1763<br>(50.6) | 1721<br>(49.4) | 30.70<br>(0.9) | 271 (7.8)  | 1722<br>(49.5) | 1459<br>(41.9)  | 1575 (45.2) | 999.90<br>(28.7) | 908 (26.1)  | 1377<br>(39.5) | 2106<br>(60.5) |

|                     |                |                 |              |             |                |                |             |                |             |                |                 |
|---------------------|----------------|-----------------|--------------|-------------|----------------|----------------|-------------|----------------|-------------|----------------|-----------------|
| Mali (2012-2013)    | 1284<br>(19.6) | 5269<br>(80.4)  | 109<br>(1.7) | 594 (9.1)   | 2998<br>(45.7) | 2852<br>(43.5) | 5460 (83.3) | 579 (8.8)      | 515 (7.9)   | 3691<br>(56.3) | 2863<br>(43.7)  |
| Niger (2012)        | 1089<br>(13.9) | 6718<br>(86.1)  | 57<br>(0.7)  | 508 (6.5)   | 3348<br>(43.0) | 3872<br>(49.7) | 6634 (85.1) | 785 (10.1)     | 380 (4.9)   | 6002<br>(76.9) | 1804<br>(23.1)  |
| Nigeria (2013)      | 6830<br>(35.2) | 12567<br>(64.8) | 543<br>(2.8) | 2646 (13.6) | 8525<br>(44.0) | 7683<br>(39.6) | 9575 (49.4) | 3679<br>(19.0) | 6143 (31.7) | 6067<br>(31.3) | 13311<br>(68.7) |
| Senegal (2010-2011) | 1468<br>(36.5) | 2555<br>(63.5)  | 96<br>(2.4)  | 558 (13.9)  | 2241<br>(55.7) | 1128<br>(28.0) | 2719 (67.6) | 838 (20.8)     | 467 (11.6)  | 2225<br>(55.3) | 1799<br>(44.7)  |
| Sierra Leone (2013) | 1704<br>(23.4) | 5571<br>(76.6)  | 110<br>(1.5) | 777 (10.7)  | 3435<br>(47.2) | 2950<br>(40.6) | 5287 (72.7) | 1017<br>(14.0) | 970 (13.3)  | 1641<br>(22.6) | 5626<br>(77.4)  |
| Togo (2013-2014)    | 1602<br>(36.2) | 2824<br>(63.8)  | 132<br>(3.0) | 720 (16.3)  | 2523<br>(57.0) | 1050<br>(23.7) | 1789 (40.4) | 1608<br>(36.3) | 1030 (23.3) | 849<br>(19.2)  | 3577<br>(80.8)  |

|                  |                       |                |                |              |             |                |                |              |                 |             |                |                |
|------------------|-----------------------|----------------|----------------|--------------|-------------|----------------|----------------|--------------|-----------------|-------------|----------------|----------------|
| <b>East (10)</b> | Burundi<br>(2010)     | 359<br>(8.0)   | 4146<br>(92.0) | 77<br>(1.7)  | 716 (15.9)  | 3071<br>(68.2) | 640 (14.2)     | 2361 (52.4)  | 1863<br>(41.4)  | 282 (6.3)   | 818<br>(18.2)  | 3687<br>(81.8) |
|                  | Comoros<br>(2012)     | 555<br>(28.6)  | 1385<br>(71.4) | 139<br>(7.1) | 405 (20.9)  | 830<br>(42.8)  | 567 (29.2)     | 841 (43.5)   | 482 (24.9)      | 611 (31.6)  | 1171<br>(60.5) | 764<br>(39.5)  |
|                  | Ethiopia<br>(2016)    | 882<br>(12.4)  | 6227 (87.6)    | 52 (0.7)     | 363 ( 5.2)  | 2223 (31.7)    | 4379 (62.4)    | 4508 ( 63.4) | 1995 (28.1)     | 605 ( 8.5)  | 5138 (72.3)    | 1971(27.7)     |
|                  | Kenya<br>(2014)       | 4481<br>(38.1) | 7284<br>(61.9) | 154<br>(1.3) | 1429 (12.2) | 6822<br>(58.0) | 3359<br>(28.6) | 1251 (10.6)  | 64160<br>(54.5) | 4099 (34.8) | 1972<br>(35.3) | 3611<br>(64.7) |
|                  | Malawi<br>(2015-2016) | 1608<br>(14.4) | 9572<br>(85.6) | 72<br>(0.6)  | 569 (5.1)   | 6549<br>(58.6) | 3990<br>(35.7) | 1404 (12.6)  | 7389<br>(66.1)  | 2387 (21.4) | 3814<br>(34.1) | 7366<br>(65.9) |
|                  | Mozambique<br>(2015)  | 800<br>(26.0)  | 2282<br>(74.0) | 46<br>(1.5)  | 170 ( 5.6)  | 995<br>(32.6)  | 1837<br>(60.3) | 884 (28.7)   | 1710<br>(55.5)  | 480 (15.9)  | 1877<br>(60.9) | 1206<br>(39.1) |
|                  | Rwanda<br>(2014-2015) | 794<br>(16.4)  | 4050<br>(83.6) | 161<br>(3.3) | 1262 (26.1) | 3107<br>(64.1) | 313 (6.5)      | 717 (14.8)   | 3513<br>(72.5)  | 614 (12.7)  | 672<br>(13.9)  | 4172<br>(86.1) |

|                        |                              |                |                |              |            |                |                |             |                |             |                |                |
|------------------------|------------------------------|----------------|----------------|--------------|------------|----------------|----------------|-------------|----------------|-------------|----------------|----------------|
|                        | Tanzania<br>(2015-<br>2016)_ | 1571<br>(27.6) | 4115<br>(72.4) | 79<br>(1.4)  | 528 (9.3)  | 3401<br>(59.9) | 1675<br>(29.5) | 1168 (20.5) | 3695<br>(65.0) | 824 (14.5)  | 1283<br>(22.6) | 4403<br>(77.4) |
|                        | Uganda<br>(2016)             | 1834<br>(22.2) | 6422<br>(77.8) | 136<br>(1.7) | 592 (7.2)  | 3709<br>(45.2) | 3773<br>(46.0) | 890 (10.8)  | 4975<br>(60.3) | 2392 (29.0) | 1746<br>(21.1) | 6510<br>(78.9) |
|                        | Zambia<br>(2013-2014)        | 2694<br>(36.3) | 4730<br>(63.7) | 60<br>(0.8)  | 420 (5.7)  | 4070<br>(54.8) | 2875<br>(38.7) | 813 (11.0)  | 4170<br>(56.2) | 2435 (32.8) | 3397<br>(45.8) | 4026<br>(54.2) |
| <b>Central<br/>(3)</b> | Congo, Rep.<br>(2011-2012)   | 2764<br>(62.1) | 1690<br>(38.0) | 83<br>(1.9)  | 469 (10.5) | 2317<br>(52.0) | 1586<br>(35.6) | 319 (7.2)   | 1307<br>(29.3) | 2829 (63.5) | 1288<br>(28.9) | 3166<br>(71.1) |
|                        | DRC (2013-<br>2014)          | 2867<br>(30.7) | 6469<br>(69.3) | 126<br>(1.3) | 925 (9.9)  | 5179<br>(55.5) | 3104<br>(33.3) | 1762 (18.9) | 4035<br>(43.2) | 3539 (37.9) | 2277<br>(24.4) | 7058<br>(75.6) |
|                        | Gabon<br>(2012)              | 2199<br>(85.6) | 371<br>(14.4)  | 74<br>(2.9)  | 294 (11.4) | 1261<br>(49.1) | 941 (36.6)     | 230 (9.0)   | 639 (24.9)     | 1700 (66.2) | 1338<br>(52.1) | 1228<br>(47.9) |

1  
2  
3  
4  
5  
6  
7  
8  
9  
10  
11  
12  
13  
14  
15  
16  
17  
18  
19  
20  
21  
22  
23  
24  
25  
26  
27  
28  
29  
30  
31  
32  
33  
34  
35  
36  
37  
38  
39  
40  
41  
42  
43  
44  
45  
46  
47

|                         |                    |                |                |                |            |                |                |           |            |                |                |                |
|-------------------------|--------------------|----------------|----------------|----------------|------------|----------------|----------------|-----------|------------|----------------|----------------|----------------|
| <b>Southern<br/>(3)</b> | Lesotho<br>(2014)  | 574<br>(28.6)  | 1434<br>(71.4) | 58<br>(2.9)    | 243 (12.1) | 1364<br>(67.9) | 343 (17.1)     | 20 (1.0)  | 902 (44.9) | 1086 (54.1)    | 1318<br>(65.6) | 690<br>(34.4)  |
|                         | Namibia<br>(2013)  | 944<br>(53.4)  | 826<br>(46.7)  | 81<br>(4.6)    | 324 (18.3) | 934<br>(52.8)  | 431(24.4)      | 136 (7.7) | 442 (25.0) | 1192 (67.4)    | 967<br>(54.7)  | 801<br>(45.3)  |
|                         | Zimbabwe<br>(2015) | 1355<br>(32.1) | 2864<br>(67.9) | 42.60<br>(1.0) | 393 (9.3)  | 2688<br>(63.7) | 1095<br>(26.0) |           | 51 (1.22)  | 1304<br>(30.9) | 2864 (67.9)    | 2478<br>(58.8) |

3

Peer review only



1  
2  
3  
4 1 Figures 1-4 ( $\geq 4$  ANC) and figures 5-8 (SBA) summarise the meta-analysis results (aORs  
5  
6 2 and 95% CI) for all 31 countries combined, as well as for regions and individual countries  
7  
8 3 (after adjusting for the five potential confounders). Pooled results for all 31 countries  
9  
10 4 (194,883 women) combined, showed weak statistically significant associations between all  
11  
12 5 four measures of women's autonomy and the utilisation of maternal services. Associations  
13  
14 6 were strongest in the Southern African region (Figures 1-8).

17  
18 7 The pooled aORs and 95% CIs for all 31 SSA countries and utilisation of  $\geq 4$  ANC visits  
19  
20 8 were: (1) for opposing domestic violence (aOR=1.07 95% CI 1.04 to 1.10); (2) for decision  
21  
22 9 making on major household income (aOR=1.13 95% CI 1.10 to 1.16); (3) for decision  
23  
24 10 making on major household purchases (aOR=1.11 95% CI 1.08 to 1.14); and (4) for  
25  
26 11 opposing sexual violence (aOR=1.09 95% CI 1.06 to 1.13).

27  
28  
29  
30  
31 12 The pooled aORs and 95% CI for all 31 SSA countries and utilisation of SBA visits were:  
32  
33 13 (1) for opposing domestic violence (aOR=1.12 95% CI 1.09 to 1.16); (2) for decision  
34  
35 14 making on major household income (aOR=1.15 95% CI 1.11 to 1.19); (3) for decision  
36  
37 15 making on major household purchases (aOR=1.08 95% CI 1.05 to 1.12); and (4) for  
38  
39 16 opposing sexual violence (aOR=1.15 95% CI 1.1 to 1.20).

40  
41  
42  
43 17 Interestingly, our country-level analyses showed that in three countries (Chad, Mali, and  
44  
45 18 Senegal), women with higher autonomy were less likely to use maternal healthcare  
46  
47 19 services. Women with higher autonomy about domestic violence were less likely to use  $\geq$   
48  
49 20 4 ANC in Chad (aOR= 0.85, 95% CI 0.71 to 1.00) and Mali (aOR= 0.83, 95% CI 0.69 to  
50  
51 21 0.99) (Figure 1). Women who made decisions on household income were less likely to use  
52  
53 22  $\geq 4$  ANC in Mali (aOR= 0.82, 95% CI 0.67 to 1.00) (Figure 2). Women who made decisions  
54  
55  
56  
57  
58  
59  
60

1  
2  
3 23 on major household purchases were less likely to use SBAs in Senegal (aOR= 0.74, 95%  
4  
5 24 CI 0.59 to 0.94) (Figure 7).  
6  
7

8  
9 25 *Figures 1 – 8 here*  
10

## 11 26 **DISCUSSION**

12  
13  
14 27 Our pooled results for all 31 countries showed weak, albeit statistically significant,  
15  
16 28 associations between women's autonomy and use of both  $\geq 4$  ANC and SBAs. The  
17  
18 29 exception was the Southern African region where three measures of women's autonomy  
19  
20 30 were relatively strongly associated with the use of maternal healthcare services.  
21  
22 31 Surprisingly, the country-level analyses suggested that in Chad, Mali, and Senegal, women  
23  
24 32 with higher autonomy on some measures were less likely to use maternal healthcare  
25  
26 33 services.  
27  
28  
29

30  
31 34 Although our combined pooled results for all 31 countries show that women's autonomy is  
32  
33 35 associated with the use of maternal healthcare services in SSA, this association was weak,  
34  
35 36 suggesting that many factors other than women's autonomy affect the use of maternal  
36  
37 37 healthcare services in SSA. In a study similar to ours, Ahmed et al. used DHS data to  
38  
39 38 investigate the autonomy and utilisation of  $\geq 4$  ANC and SBA in 31 developing countries,  
40  
41 39 including 21 SSA counties.<sup>51</sup> They found weaker associations between women's autonomy  
42  
43 40 and utilisation of maternal healthcare services in SSA than in other parts of the world. For  
44  
45 41 example, the pooled aORs for autonomy and  $\geq 4$  ANC was 1.52 for all 31 countries and  
46  
47 42 1.29 in the 21 SSA countries.<sup>51</sup> Note that we used slightly different DHS measures of  
48  
49 43 autonomy to Ahmed et al. We used women's attitudes to violence as well as women's  
50  
51 44 participation in decisions (finance and major household purchases), while Ahmed et al.  
52  
53  
54  
55  
56  
57  
58  
59  
60

1  
2  
3 45 only examined women's autonomy about decisions. The paper by Ahmed et al. was  
4  
5  
6 46 published in 2010 and so used older DHS data than we did.  
7

8  
9 47 Based mainly on studies in Asia, women's autonomy is considered a crucial contributor to  
10  
11 48 their utilisation of maternal healthcare services. For example, women's autonomy has  
12  
13 49 consistently been shown to be associated with the utilisation of ANC and SBA in South  
14  
15 50 and Northern India,<sup>9 14</sup> and in Nepal and Indonesia where women's financial autonomy has  
16  
17 51 been found to be associated with their utilisation of maternal healthcare service.<sup>22 23</sup>  
18  
19

20  
21 52 Three measures of women's autonomy were relatively strongly related to use of maternal  
22  
23 53 healthcare services in the Southern African region. Women who made decisions on  
24  
25 54 household income, who opposed sexual violence, and who made decisions on major  
26  
27 55 household purchases were nearly 50% more likely to use both  $\geq 4$  ANC and SBA.  
28  
29

30  
31 56 Weaker associations in other African regions are unlikely to be explained by differences in  
32  
33 57 women's education or household wealth, as we adjusted for these variables. The  
34  
35 58 explanation is probably related to differences in economic development and culture across  
36  
37 59 countries in SSA.<sup>51-53</sup> A qualitative study in Zambia found that factors leading to delivery  
38  
39 60 at home rather than at a clinic included: lack of female autonomy, the influence of husbands  
40  
41 61 and parents, perceived low quality of clinic-based services, and positive attitudes towards  
42  
43 62 traditional birth attendants.<sup>28</sup> Jayachandran showed that the level of female autonomy  
44  
45 63 tended to be higher in countries with higher GDP per capita.<sup>53</sup> Economic development is  
46  
47 64 also associated with better education for men and women and higher quality health  
48  
49 65 services.  
50  
51  
52  
53  
54

55 66  
56  
57  
58  
59  
60

1  
2  
3 67 One unexpected finding in our study is that women with higher autonomy on some  
4  
5 68 measures in Chad, Mali and Senegal were less likely to utilise either  $\geq 4$  ANC or SBA than  
6  
7  
8 69 women with less autonomy. These results are consistent with some previous research in  
9  
10 70 Malawi and Mali.<sup>25 54</sup> In a study in Malawi it was found that women with higher autonomy  
11  
12 71 were less likely to be accompanied by their male partners to ANC services.<sup>25</sup> In Mali,  
13  
14 72 Upadhyay and colleagues found that women who had higher autonomy towards sexual  
15  
16 73 violence tended to have more children, perhaps because higher fertility is regarded as a  
17  
18 74 sign of autonomy.<sup>54 55</sup> Another explanation for the inverse associations that we observed  
19  
20 75 might be that more empowered women in Chad, Mali and Senegal might be more likely to  
21  
22 76 successfully refuse to use maternal healthcare services that they perceive to be  
23  
24 77 inadequate.<sup>56-60</sup>

25  
26  
27  
28  
29 78 The strengths of our study are that we used nationally representative DHS surveys from  
30  
31 79 countries across SSA in addition to utilisation of four separate measures of female  
32  
33 80 autonomy. One of the limitations is that DHS surveys are cross-sectional studies where  
34  
35 81 autonomy is measured after the relevant pregnancy has occurred. Longitudinal studies  
36  
37 82 measuring women's autonomy before pregnancy and then following women through to the  
38  
39 83 end of the pregnancy, assessing utilisation of maternal healthcare services, would provide  
40  
41 84 higher quality evidence about the causal relationship between autonomy and  $\geq 4$  ANC and  
42  
43 85 SBA. Also, we did not study as separate variables the four recommended ANC timings –  
44  
45 86 first visit 8-12 weeks, second visit 24-26 weeks, third visit 32 weeks, and the fourth visit  
46  
47 87 36-38 weeks.<sup>5</sup> Another limitation is the measurement of autonomy. Despite many  
48  
49 88 definitions and measures of women's autonomy, no measure can capture its true complex  
50  
51 89 meaning.<sup>10 19 22 24 46</sup> Women's autonomy remains a multifaceted concept which varies  
52  
53 90 between cultures and societies, even within the same country.<sup>8 54</sup> Poor measurements of  
54  
55 91 autonomy may explain why we found such weak associations between autonomy and use  
56  
57 92 of maternal healthcare services. The DHS provides useful indicators of autonomy for  
58  
59 93 comparison across countries, but further in-depth research into cultural differences

1  
2  
3 94 concerning the meaning of autonomy is needed for a better understanding of women's  
4 95 autonomy and its association with maternal healthcare.

6 96

## 9 97 **CONCLUSION**

11 98 The overall goal of this study was to examine the association between women's autonomy  
12 99 and the utilisation of maternal healthcare services –  $\geq 4$  ANC visits and delivery by SBA –  
13 100 across 31 SSA countries. We found weak associations at both regional and country level.  
14 101 The exception was the Southern Africa region where associations between women's  
15 102 autonomy and the utilisation of maternal healthcare services were reasonably strong.  
16 103 Further research on women's autonomy is needed in SSA to inform gender and health  
17 104 policies concerning utilisation of maternal healthcare services. Moreover, additional  
18 105 research is required into the inverse associations between some countries where women  
19 106 with higher autonomy on some measures were less likely to use maternal healthcare  
20 107 services.

## 35 108 **Contributors**

38 109 The concept was initiated by CC, who also collected the data, produced the tables and  
39 110 figures and wrote the first draft. All authors contributed to the study design and review of  
40 111 the manuscript with vital input from KA and RGC. KA contributed significantly to the  
41 112 statistical analyses. JN provided critical contributions to the paper.

## 48 113 **Role of the funding**

51 114 No funding to declare.

## 54 115 **Competing interests**

1  
2  
3 116 The authors have no competing interests to declare.  
4  
5

6 117 **Ethical approval**  
7

8  
9 118 This study is based on publicly available DHS data. CC was granted access to the data by  
10  
11 119 the MEASURE DHS/ICF International, Rockville, Maryland, USA.  
12  
13

14 120 **Data sharing statement**  
15

16 121 The data used in this study are freely accessible to the public at the DHS website  
17  
18 122 <https://www.dhsprogram.com/Data/>.  
19  
20  
21  
22  
23  
24  
25  
26  
27  
28  
29  
30  
31  
32  
33  
34  
35  
36  
37  
38  
39  
40  
41  
42  
43  
44  
45  
46  
47  
48  
49  
50  
51  
52  
53  
54  
55  
56  
57  
58  
59  
60

1  
2  
3 **124 REFERENCES**  
4  
5

- 6 *125* 1. Alkema L, Chou D, Hogan D, et al. Global, regional, and national levels and  
7  
8 *126* trends in maternal mortality between 1990 and 2015, with scenario-based  
9  
10 *127* projections to 2030: a systematic analysis. *Lancet* 2016; 387(10017): 462-74.  
11  
12  
13  
14 *128* 2. Kassebaum NL, Shackelford KA, Bertozzi-Villa A, Coggeshall MS, Geleijnse  
15  
16 *129* JM, Heuton KR, et al. Global, regional, and national levels and causes of maternal  
17  
18 *130* mortality during 1990–2013: a systematic analysis for the Global Burden of  
19  
20 *131* Disease Study 2013. *Lancet* 2014;384(9947):980-1004.  
21  
22  
23  
24 *132* 3. AbouZahr C, Wardlaw T. Maternal mortality at the end of a decade: signs of  
25  
26 *133* progress? *Bulletin of the World Health Organization* 2001; 79(6): 561-8.  
27  
28  
29  
30 *134* 4. UNFPA. Maternal health thematic fund annual report 2014: Surging towards the  
31  
32 *135* 2015 deadline. Washington DC: UNFPA, 2015.  
33  
34 *136* [http://www.unfpa.org/sites/default/files/pub-](http://www.unfpa.org/sites/default/files/pub-pdf/MHTF%20annual%20report%20for%20WEB_0.pdf)  
35  
36 *137* [pdf/MHTF%20annual%20report%20for%20WEB\\_0.pdf](http://www.unfpa.org/sites/default/files/pub-pdf/MHTF%20annual%20report%20for%20WEB_0.pdf) (accessed Oct 11, 2015).  
37  
38  
39  
40 *138* 5. WHO. Antenatal care. Geneva: WHO int, 2016.  
41  
42 *139* [http://www.who.int/pmnch/media/publications/aonsectionIII\\_2.pdf](http://www.who.int/pmnch/media/publications/aonsectionIII_2.pdf) (accessed July  
43  
44 *140* 7, 2016).  
45  
46  
47 *141* 6. Alam N, Hajizadeh M, Dumont A, et al. Inequalities in maternal health care  
48  
49 *142* utilization in sub-Saharan African countries: a multiyear and multi-country  
50  
51 *143* analysis. *PloS One* 2015; 10(4): e0120922.  
52  
53  
54  
55  
56  
57  
58  
59  
60

- 1  
2  
3 144 7. Ronsmans C, Etard J-F, Walraven G, et al. Maternal mortality and access to  
4  
5 145 obstetric services in West Africa. *Tropical Medicine & International Health* 2003;  
6  
7 146 8(10): 940-8.  
8  
9  
10  
11 147 8. Kishor S, Subaiya L. Understanding womens empowerment: a comparative  
12  
13 148 analysis of Demographic and Health Surveys (DHS) data. Maryland: Macro  
14  
15 149 International, 2008. <https://dhsprogram.com/pubs/pdf/CR20/CR20.pdf> (accessed  
16  
17 150 June 10, 2017).  
18  
19  
20  
21 151 9. Mistry R, Galal O, Lu M. Women's autonomy and pregnancy care in rural India:  
22  
23 152 A contextual analysis. *Social Science & Medicine* 2009;69(6):926-33.  
24  
25  
26 153 10. Woldemicael G. Do women with higher autonomy seek more maternal health  
27  
28 154 care? evidence from Eritrea and Ethiopia. *Health Care for Women International*  
29  
30 155 2010; 31(7): 599-620.  
31  
32  
33  
34 156 11. Haque M, Islam TM, Tareque MI, et al. Women empowerment or autonomy: A  
35  
36 157 comparative view in Bangladesh context. *Bangladesh e-Journal of Sociology*  
37  
38 158 2011;8(2):17-30.  
39  
40  
41  
42 159 12. Oppenheim Mason K, editor *The impact of women's social position on fertility in*  
43  
44 160 *developing countries*. Sociological Forum; 1987: Springer.  
45  
46  
47 161 13. Bott S, Jejeebhoy SJ. Adolescent sexual and reproductive health in South Asia: an  
48  
49 162 overview of findings from the 2000 Mumbai conference. Geneva: World Health  
50  
51 163 Organization.  
52  
53  
54  
55  
56  
57  
58  
59  
60



- 1  
2  
3 164 14. Bloom SS, Wypij D, Gupta MD. Dimensions of women's autonomy and the  
4  
5 165 influence on maternal health care utilization in a north Indian city. *Demography*  
6  
7 166 2001; 38(1): 67-78.  
8  
9  
10  
11 167 15. Kabeer N. Reflections on the Measurement of Women's Empowerment: In  
12  
13 168 *Discussing Women's Empowerment-Theory and Practice*", Sida Studies No. 3.  
14  
15 169 Novum Grafiska AB, Stockholm. 2001.  
16  
17  
18 170 16. Malhotra A, Shuler S, Boender C. Measuring women's empowerment as a  
19  
20 171 variable in international development. Washington DC: Work Bank, 2002.  
21  
22 172 [https://siteresources.worldbank.org/INTGENDER/Resources/MalhotraSchulerBo](https://siteresources.worldbank.org/INTGENDER/Resources/MalhotraSchulerBoender.pdf)  
23  
24 173 [ender.pdf](https://siteresources.worldbank.org/INTGENDER/Resources/MalhotraSchulerBoender.pdf) (accessed April 28, 2017).  
25  
26  
27  
28 174 17. Dyson T, Moore M. On kinship structure, female autonomy, and demographic  
29  
30 175 behavior in India. *Population and Development Review* 1983; 35-60.  
31  
32  
33  
34 176 18. Basu AM. *Culture, the status of women and demographic behaviour: illustrated*  
35  
36 177 *with the case of India*. London: Oxford University Press, 1992.  
37  
38  
39 178 19. Kabeer N, McFadden P, Arnfred S, et al. *Discussing women's empowerment -*  
40  
41 179 *theory and practice*. Stockholm: Sida Studies No3, 2001.  
42  
43 180 <http://www.sida.se/contentassets/51142018c739462db123fc0ad6383c4d/discussin>  
44  
45 181 [g-womens-empowerment---theory-and-practice\\_1626.pdf](http://www.sida.se/contentassets/51142018c739462db123fc0ad6383c4d/discussin) (accessed Sep 17,  
46  
47 182 2015).  
48  
49  
50  
51  
52  
53  
54  
55  
56  
57  
58  
59  
60

- 1  
2  
3 183 20. Jejeebhoy SJ, Sathar ZA. Women's autonomy in India and Pakistan: the influence  
4  
5 184 of religion and region. *Population and Development Review* 2001; 27(4): 687-  
6  
7 185 712.  
8  
9  
10  
11 186 21. Mason KO, Smith HL. Husbands' versus wives' fertility goals and use of  
12  
13 187 contraception: The influence of gender context in five Asian countries.  
14  
15 188 *Demography*;2000;37(3):299-311.  
16  
17  
18 189 22. Furuta M, Salway S. Women's position within the household as a determinant of  
19  
20 190 maternal health care use in Nepal. *International Family Planning Perspectives*  
21  
22 191 2006; 17-27.  
23  
24  
25  
26 192 23. Beegle K, Frankenberg E, Thomas D. Bargaining power within couples and use of  
27  
28 193 prenatal and delivery care in Indonesia. *Stud Fam Plann* 2001; 32(2): 130-46.  
29  
30  
31  
32 194 24. Shimamoto K, Gipson JD. The relationship of women's status and empowerment  
33  
34 195 with skilled birth attendant use in Senegal and Tanzania. *BMC Pregnancy and*  
35  
36 196 *Childbirth* 2015; 15: 154.  
37  
38  
39 197 25. Jennings L, Na M, Cherewick M, et al. Women's empowerment and male  
40  
41 198 involvement in antenatal care: analyses of Demographic and Health Surveys  
42  
43 199 (DHS) in selected African countries. *BMC Pregnancy and Childbirth*. 2014;  
44  
45 200 14(1): 297.  
46  
47  
48  
49 201 26. Fotso J-C, Ezeh AC, Essendi H. Maternal health in resource-poor urban settings:  
50  
51 202 how does women's autonomy influence the utilization of obstetric care services?  
52  
53 203 *Reproductive Health* 2009; 6(1): 9.  
54  
55  
56  
57  
58  
59  
60

- 1  
2  
3 204 27. Osamor PE, Grady C. Women's autonomy in health care decision-making in  
4  
5 205 developing countries: a synthesis of the literature. *International Journal of*  
6  
7 206 *Women's Health*. 2016;8:191.
- 8  
9  
10  
11 207 28. Sialubanje C, Massar K, Hamer D, et al. Reasons for home delivery and use of  
12  
13 208 traditional birth attendants in rural Zambia: a qualitative study. *BMC Pregnancy*  
14  
15 209 *and Childbirth*. 2015;15(1):216.
- 16  
17  
18 210 29. DHS Program. Data collection. Available from:  
19  
20 211 <https://www.dhsprogram.com/data/data-collection.cfm>. (accessed Sep 29, 2018).
- 21  
22  
23  
24 212 30. Rutstein SO, Rojas G. Guide to DHS statistics. Maryland: Macro International,  
25  
26 213 2006. [http://pdf.usaid.gov/pdf\\_docs/Pnacy778.pdf](http://pdf.usaid.gov/pdf_docs/Pnacy778.pdf) (accessed July 29, 2017).
- 27  
28  
29 214 31. Graham WJ, Bell JS, Bullough CH. Can skilled attendance at delivery reduce  
30  
31 215 maternal mortality in developing countries? *Studies Health Serv Organ Policy*  
32  
33 216 *2001; 17: 97–130*.
- 34  
35  
36  
37 217 32. Garcia Moreno C. Responding to sexual violence in conflict. *Lancet* 2014; 383:  
38  
39 218 2033–4.
- 40  
41  
42  
43 219 33. United Nations. Women Spotlight on Sustainable Development Goal 5: Achieve  
44  
45 220 gender equality and empower all women and girls. 2017.  
46  
47 221 [http://www.unwomen.org/en/digital-library/multimedia/2017/7/infographic-](http://www.unwomen.org/en/digital-library/multimedia/2017/7/infographic-spotlight-on-sdg-5)  
48  
49 222 [spotlight-on-sdg-5](http://www.unwomen.org/en/digital-library/multimedia/2017/7/infographic-spotlight-on-sdg-5) (accessed Sep 10, 2017).
- 50  
51  
52  
53 223 34. United Nations Population Information Network, UN Population Division, and  
54  
55 224 UNFPA. Report of the International Conference on Population and Development(

- 1  
2  
3 225 ICPD). 1994. <http://www.un.org/popin/icpd/conference/offeng/poa.html> (accessed  
4  
5 226 Sep 10, 2017).  
6  
7  
8  
9 227 35. Corroon M, Speizer IS, Fotso J-C, et al. The role of gender empowerment on  
10  
11 228 reproductive health outcomes in urban Nigeria. *Maternal & Child Health Journal*  
12  
13 229 2014; 18(1): 307-15.  
14  
15  
16 230 36. Horn R, Puffer ES, Roesch E, et al. Women's perceptions of effects of war on  
17  
18 231 intimate partner violence and gender roles in two post-conflict West African  
19  
20 232 Countries: consequences and unexpected opportunities. *Conflict and Health* 2014;  
21  
22 233 8(1): 12-12.  
23  
24  
25  
26 234 37. Hatcher AM, Woollett N, Pallitto CC, et al. Bidirectional links between HIV and  
27  
28 235 intimate partner violence in pregnancy: Implications for prevention of mother-to-  
29  
30 236 child transmission. *Journal of the International AIDS Society* 2014; 17.  
31  
32  
33  
34 237 38. Flach C, Leese M, Heron J, et al. Antenatal domestic violence, maternal mental  
35  
36 238 health and subsequent child behaviour: a cohort study. *International Journal of*  
37  
38 239 *Obstetrics & Gynaecology* 2011; 118(11): 1383-1391.  
39  
40  
41  
42 240 39. Joharifard S, Rulisa S, Niyonkuru F, et al. Prevalence and predictors of giving  
43  
44 241 birth in health facilities in Bugesera District, Rwanda. *BMC Public Health* 2012;  
45  
46 242 12(1): 1049-1049.  
47  
48  
49 243 40. Nigatu D, Gebremariam A, Abera M, et al. Factors associated with women's  
50  
51 244 autonomy regarding maternal and child health care utilization in Bale: A  
52  
53 245 community based cross-sectional study. *BMC Women's Health* 2014;14(1).

- 1  
2  
3 246 41. Kamiya Y. Women's autonomy and reproductive health care utilisation: Empirical  
4  
5 247 evidence from Tajikistan. *Health Policy* 2011; 102(2): 304-313.  
6  
7  
8 248 42. Sambo LG, Kirigia JM, Ki-Zerbo G. Perceptions and viewpoints on proceedings  
9  
10 249 of the fifteenth assembly of heads of state and government of the African Union  
11  
12 250 debate on maternal, newborn and child health and development, 25-27 July 2010,  
13  
14 251 Kampala, Uganda. *BMC Proceedings* 2011; 5 Suppl 5: S1-S.  
15  
16  
17  
18 252 43. Zakane SA, Gustafsson LL, Tomson G, et al. Guidelines for maternal and  
19  
20 253 neonatal "point of care": needs of and attitudes towards a computerized clinical  
21  
22 254 decision support system in rural Burkina Faso. *Int J Med Inf* 2014; 83(6): 459-69.  
23  
24  
25  
26 255 44. Crowe S, Utley M, Costello A, et al. How many births in sub-Saharan Africa and  
27  
28 256 South Asia will not be attended by a skilled birth attendant between 2011 and  
29  
30 257 2015? *BMC Pregnancy & Childbirth* 2012; 12: 4.  
31  
32  
33  
34 258 45. Kalule-Sabiti I, Amoateng AY, Ngake M. The effect of socio-demographic  
35  
36 259 factors on the utilization of maternal health care services in Uganda. *African*  
37  
38 260 *Population Studies* 2014; 28(1): 515-25.  
39  
40  
41  
42 261 46. Gabrysch S, Campbell OMR. Still too far to walk: Literature review of the  
43  
44 262 determinants of delivery service use. *BMC Pregnancy and Childbirth* 2009; 9(1):  
45  
46 263 34.  
47  
48  
49 264 47. Singh K, Bloom S, Haney E, et al. Gender equality and childbirth in a health  
50  
51 265 facility: Nigeria and MDG5. *African Journal of Reproductive Health* 2012; 16(3):  
52  
53 266 122.  
54  
55  
56  
57  
58  
59  
60

- 1  
2  
3 267 48. Chi PC, Bulage P, Urdal H, et al. A qualitative study exploring the determinants  
4  
5 268 of maternal health service uptake in post-conflict Burundi and Northern Uganda.  
6  
7 269 BMC Pregnancy and Childbirth 2015; 15: 18.  
8  
9  
10  
11 270 49. Rabe-Hesketh S, Skrondal A. Multilevel and longitudinal modeling using Stata.  
12  
13 271 Texas:STATA press; 2008.  
14  
15  
16 272 50. StataCorp. Stata Statistical Software: Release 14. College Station, Texas:  
17  
18 273 StataCorp LP; 2015.  
19  
20  
21 274 51. Ahmed S, Creanga AA, Gillespie DG, et al. Economic status, education and  
22  
23 275 empowerment: implications for maternal health service utilization in developing  
24  
25 276 countries. PloS One, 2010; 5(6): e11190.  
26  
27  
28  
29 277 52. Obeidat R. How Can Women in Developing Countries Make Autonomous Health  
30  
31 278 Care Decisions? Women Heal Int 2(1): 116. . Women's Health International.  
32  
33 279 2016;2(1):116.  
34  
35  
36  
37 280 53. Jayachandran S. The roots of gender inequality in developing countries.  
38  
39 281 Economics. 2015;7(1):63-88.  
40  
41  
42  
43 282 54. Upadhyay UD, Karasek D. Women's empowerment and ideal family size: an  
44  
45 283 examination of DHS empowerment measures in Sub-Saharan Africa. International  
46  
47 284 Perspectives on Sexual and Reproductive Health 2012; 78-89.  
48  
49  
50  
51 285 55. Dyer SJ. The value of children in African countries—insights from studies on  
52  
53 286 infertility. J Psychosom Obstet Gynaecol 2007; 28(2): 69-77.  
54  
55  
56  
57  
58  
59  
60

- 1  
2  
3 287 56. Chol C, Hunter C, Debru B, et al. Stakeholders' perspectives on facilitators of and  
4  
5 288 barriers to the utilisation of and access to maternal health services in Eritrea: a  
6  
7 289 qualitative study. *BMC Pregnancy and Childbirth*; 2018;18(1):35.
- 10 290 57. Miller S, Cordero M, Coleman A, et al. Quality of care in institutionalized  
11  
12 291 deliveries: the paradox of the Dominican Republic. *International Journal of*  
13  
14 292 *Gynecology & Obstetrics*;2003;82(1):89-103.
- 18 293 58. Thomas TN, Gausman J, Lattof SR, et al. Improved maternal health since the  
19  
20 294 ICPD: 20 years of progress. *Contraception*;2014;90(6 Suppl):S32-S8.
- 24 295 59. More NS, Bapat U, Das S, et al. Community mobilization in Mumbai slums to  
25  
26 296 improve perinatal care and outcomes: a cluster randomized controlled trial. *PLoS*  
27  
28 297 *medicine*; 2012;9(7):e1001257.
- 32 298 60. Kruk ME, Leslie HH, Verguet S, et al. Quality of basic maternal care functions in  
33  
34 299 health facilities of five African countries: an analysis of national health system  
35  
36 300 surveys. *Lancet Global Health* 2016. <http://dx.doi.org/10.1016/S2214->  
37  
38 301 [109X\(16\)30180-2](http://dx.doi.org/10.1016/S2214-109X(16)30180-2)

302

1  
2  
3 304 **Figure 1:** The association between women's autonomy (opposing domestic violence) and  
4  
5 305 utilisation of  $\geq 4$  ANC visits in 31 Sub-Saharan African countries, 2010-2016  
6

7  
8 306 **Figure 2:** The association between women's autonomy (opposing domestic violence) and  
9  
10 307 utilisation of  $\geq 4$  ANC visits in 31 Sub-Saharan African countries, 2010-2016  
11

12 308 **Figure 3:** The association between women's autonomy (decisions making on spending of  
13  
14 309 household income) and utilisation of  $\geq 4$  ANC visits in 31 Sub-Saharan African  
15  
16 310 countries, 2010-2016  
17

18  
19 311 **Figure 4:** The association between women's autonomy (decision making on major  
20  
21 312 household purchases) and utilisation of  $\geq 4$  ANC visits in 31 Sub-Saharan African  
22  
23 313 countries, 2010-2016.  
24

25  
26 314 **Figure 4:** The association between women's autonomy in opposing sexual violence and  
27  
28 315 utilisation of  $\geq 4$  ANC visits in 31 Sub-Saharan African countries, 2010-2016  
29

30  
31 316 **Figure 5:** The association between women's autonomy (opposing domestic violence) and  
32  
33 317 utilisation of SBA in 31 Sub-Saharan African countries, 2010-2016  
34

35 318 **Figure 6:** The association between women's autonomy (decisions making on spending of  
36  
37 319 household income) and utilisation of SBA in 31 Sub-Saharan African countries, 2010-  
38  
39 320 2016  
40

41  
42 321 **Figure 7:** The association between women's autonomy (decision making on major  
43  
44 322 household purchases) and utilisation of SBA in 31 Sub-Saharan African countries, 2010-  
45  
46 323 2016  
47

48  
49 324 **Figure 8:** The association between women's autonomy (opposing sexual violence) and  
50  
51 325 utilisation of SBA in 31 Sub-Saharan African countries, 2010-2016.  
52  
53  
54  
55  
56  
57  
58  
59  
60



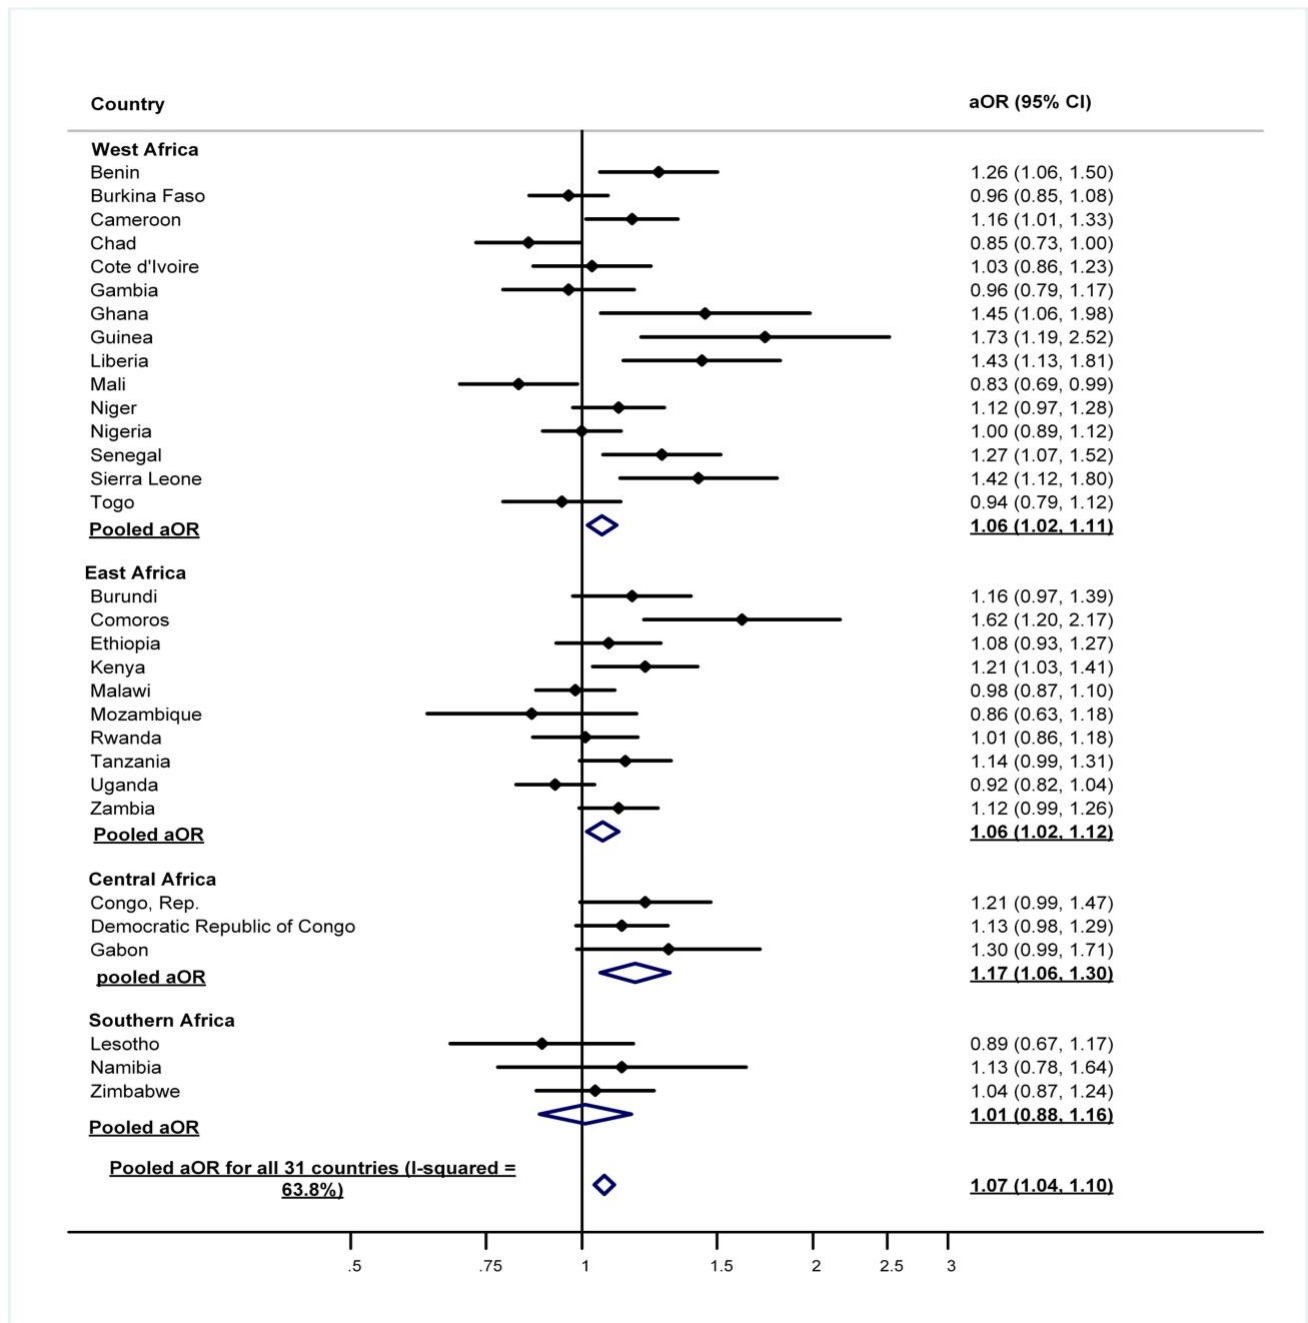

aOR = adjusted odd ratios for: place of residence, women age at married or cohabitation, education attainment, household wealth index, and working status

**Figure 1: The association between women autonomy (opposing domestic violence) and utilisation of  $\geq 4$  ANC visits in 31 sub-Saharan African countries, 2010-2016.**

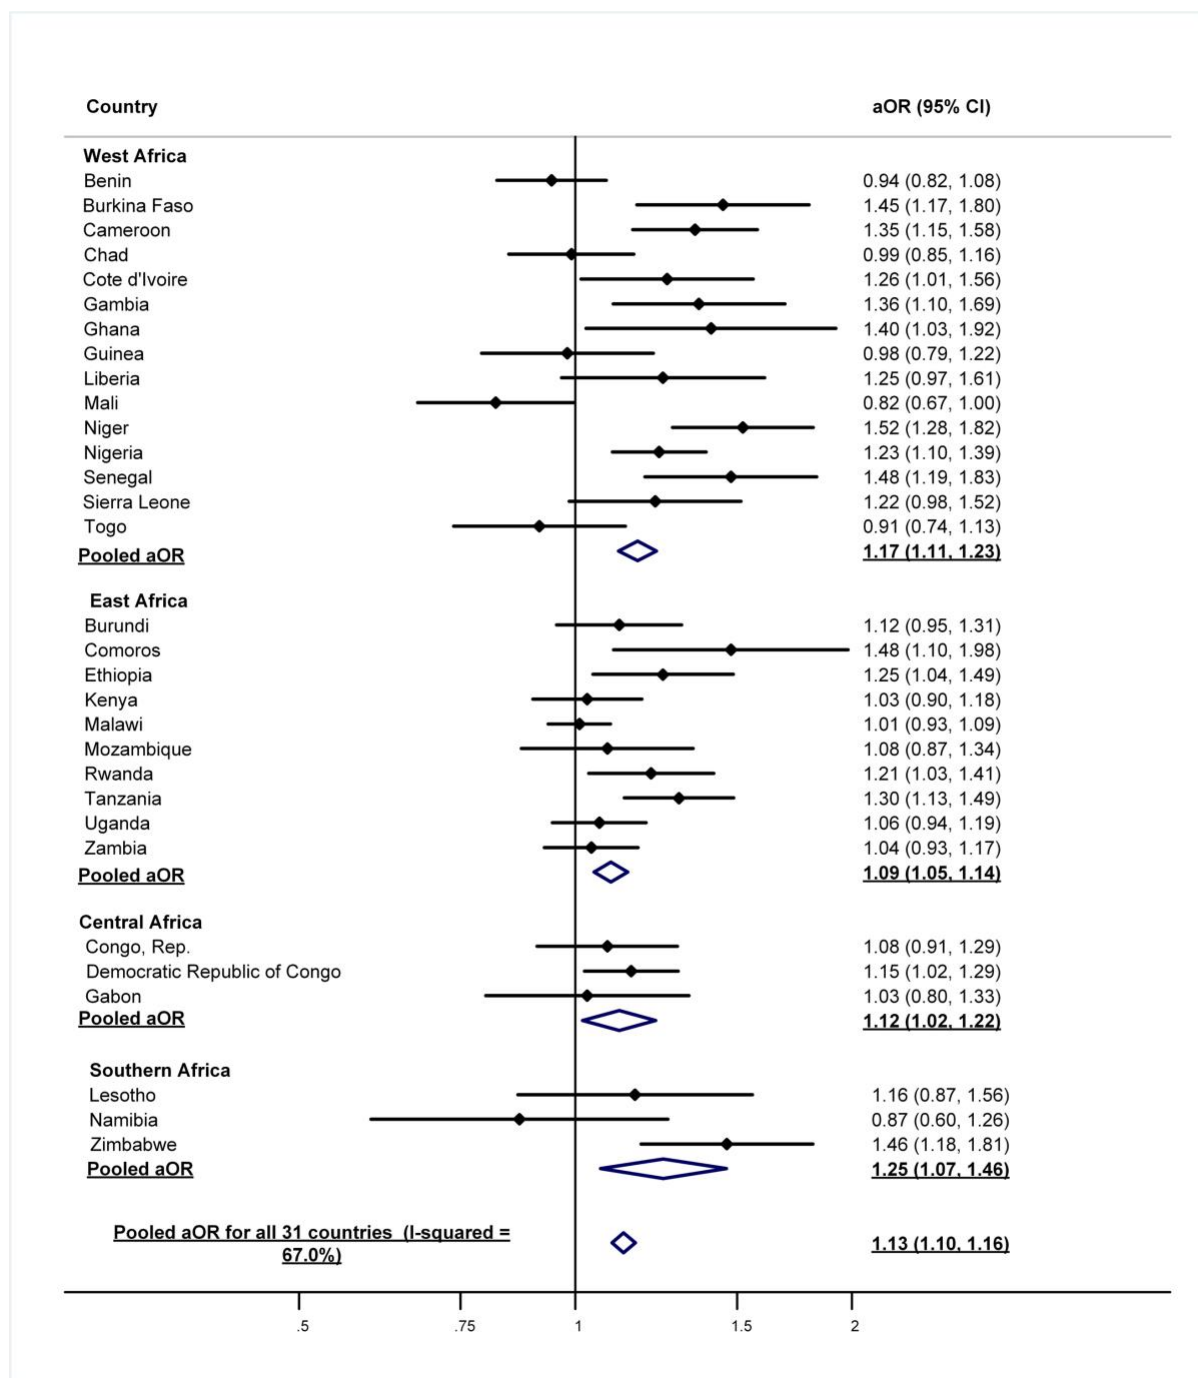

aOR = adjusted odd ratios for: place of residence, women age at married or cohabitation, education attainment, household wealth index, and working status

**Figure 2: The association between women autonomy (decisions making on spending of household income) and utilisation of  $\geq 4$  ANC visits in 31 sub-Saharan African countries, 2010-2016.**

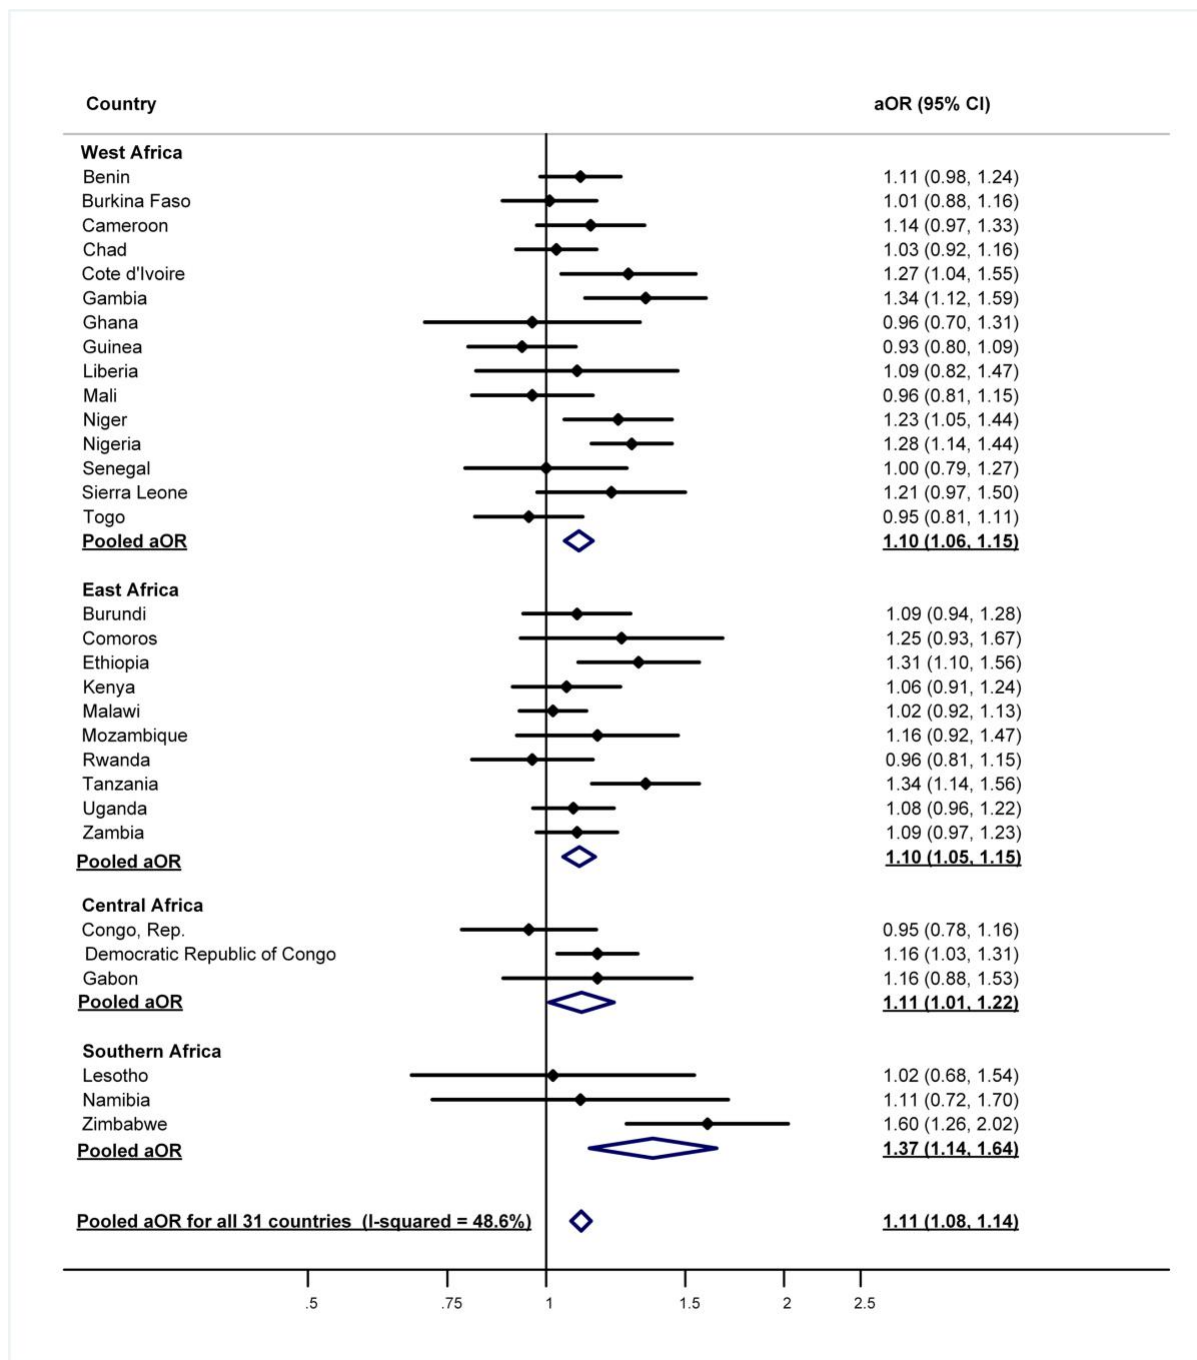

aOR = adjusted odd ratios for: place of residence, women age at married or cohabitation, education attainment, household wealth index, and working status

**Figure 3: The association between women autonomy (decision making on major household purchases) and utilisation of  $\geq 4$  ANC visits in 31 sub-Saharan African countries, 2010-2016.**

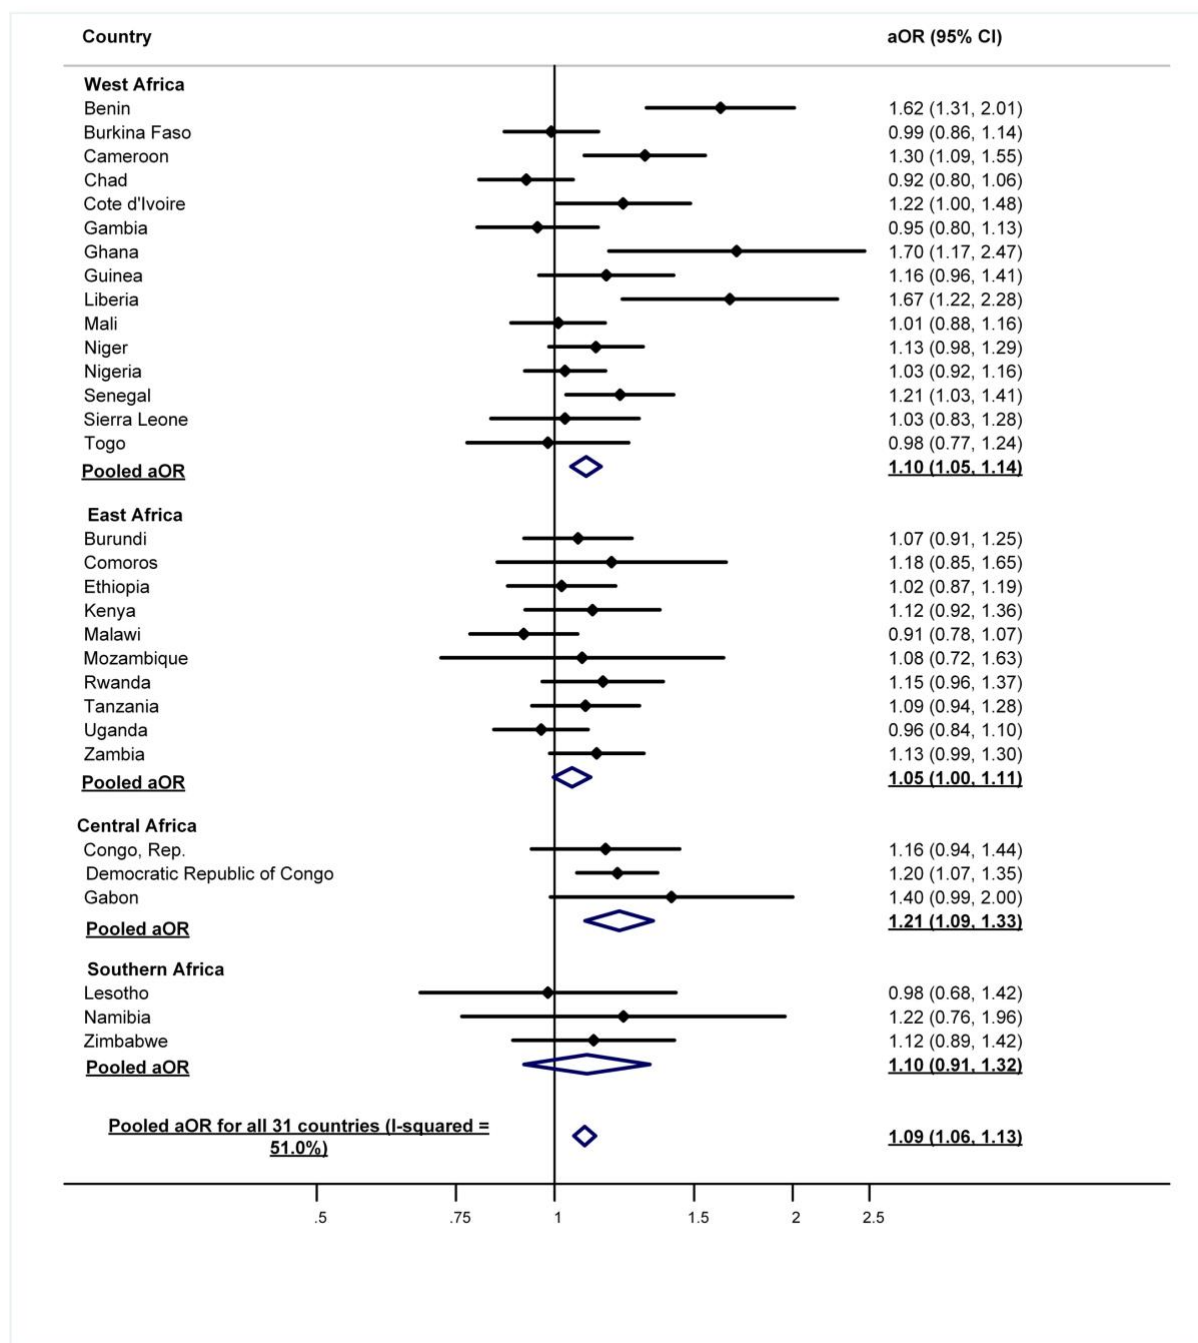

aOR = adjusted odd ratios for: place of residence, women age at married or cohabitation, education attainment, household wealth index, and working status

**Figure 4: The association between women autonomy in opposing sexual violence and utilisation of  $\geq 4$  ANC visits in 31 sub-Saharan African countries, 2010-2016.**

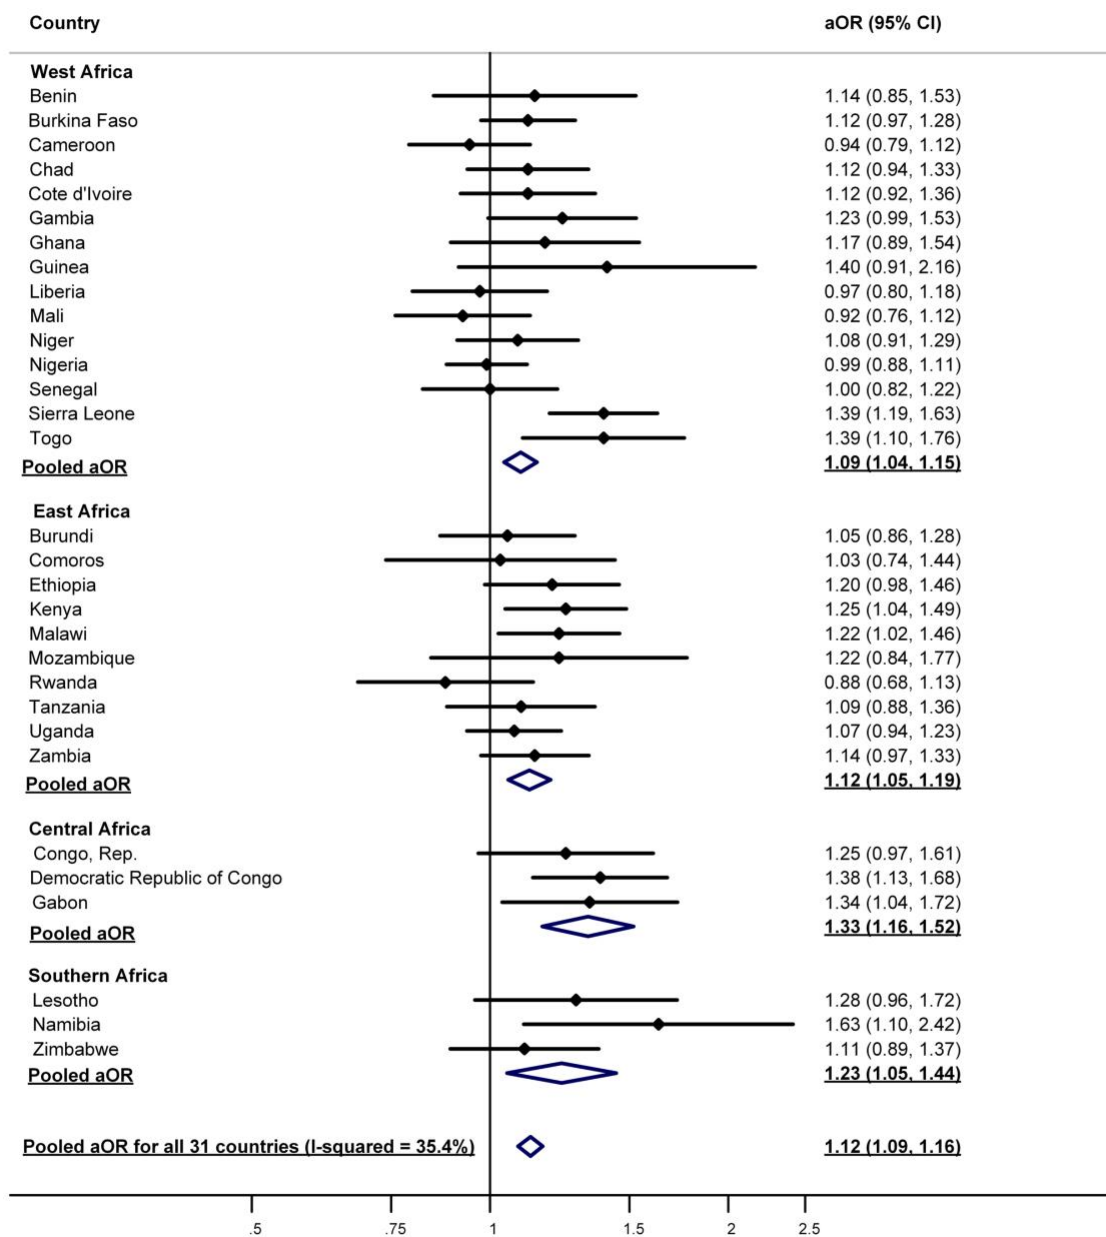

aOR = adjusted odd ratios for: place of residence, women age at married or cohabitation, education attainment, household wealth index, and working status

**Figure 5: The association between women autonomy (opposing domestic violence) and utilisation of SBAs in 31 sub-Saharan African countries, 2010-2016.**

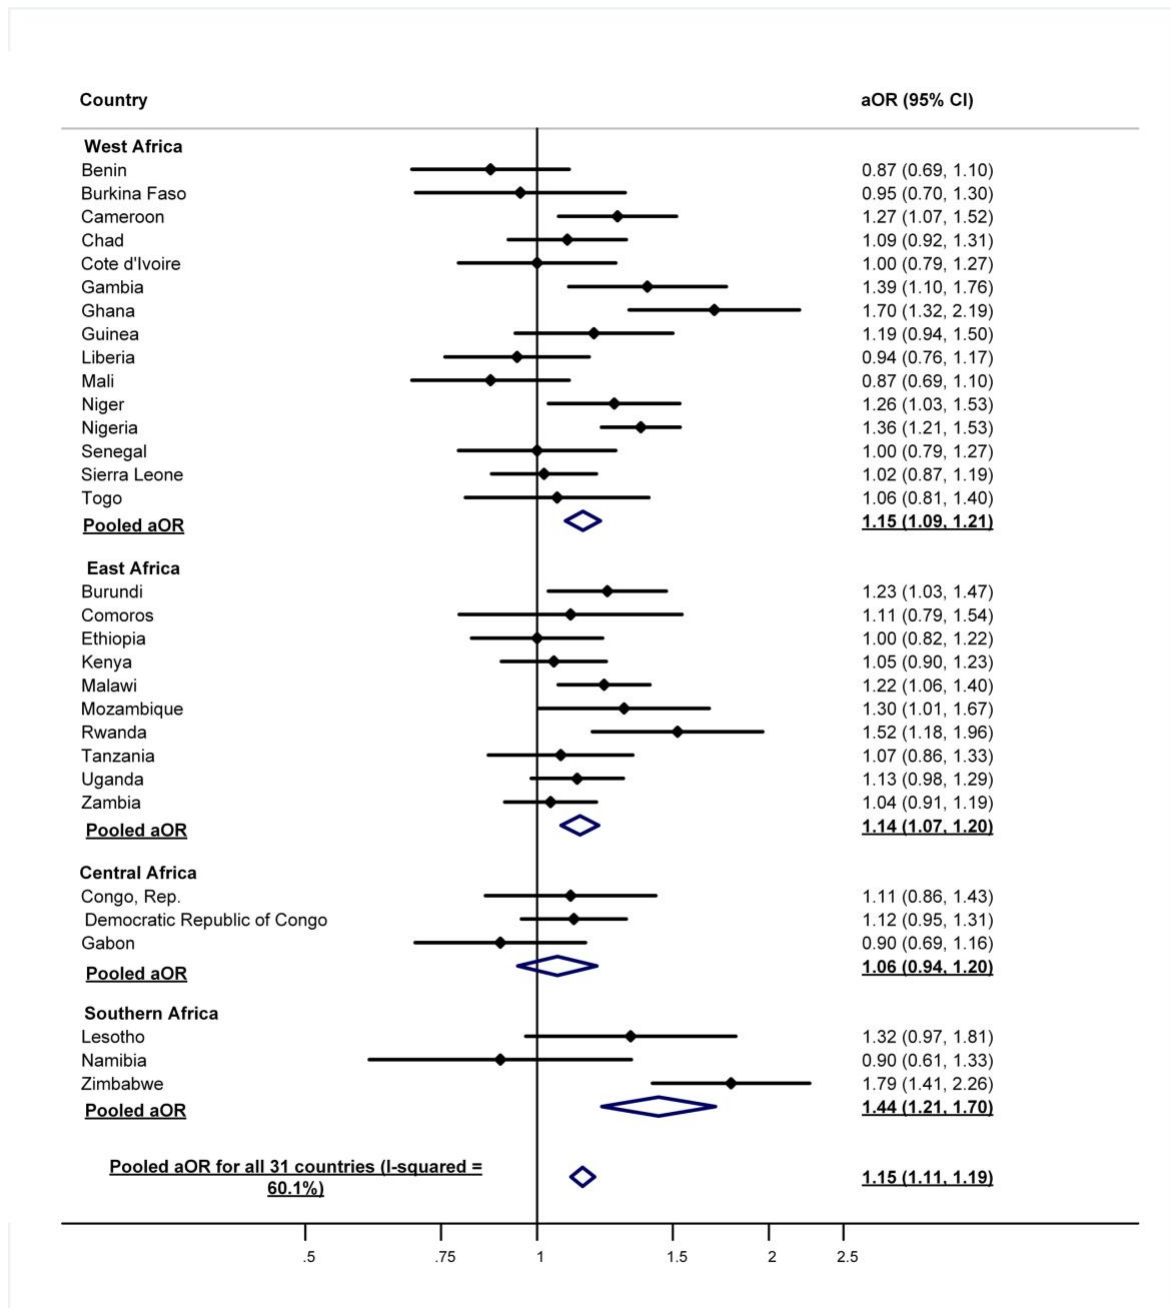

aOR = adjusted odd ratios for: place of residence, women age at married or cohabitation, education attainment, household wealth index, and working status

**Figure 6: The association between women autonomy (decisions making on spending of household income) and utilisation of SBAs in 31 sub-Saharan African countries, 2010-2016.**



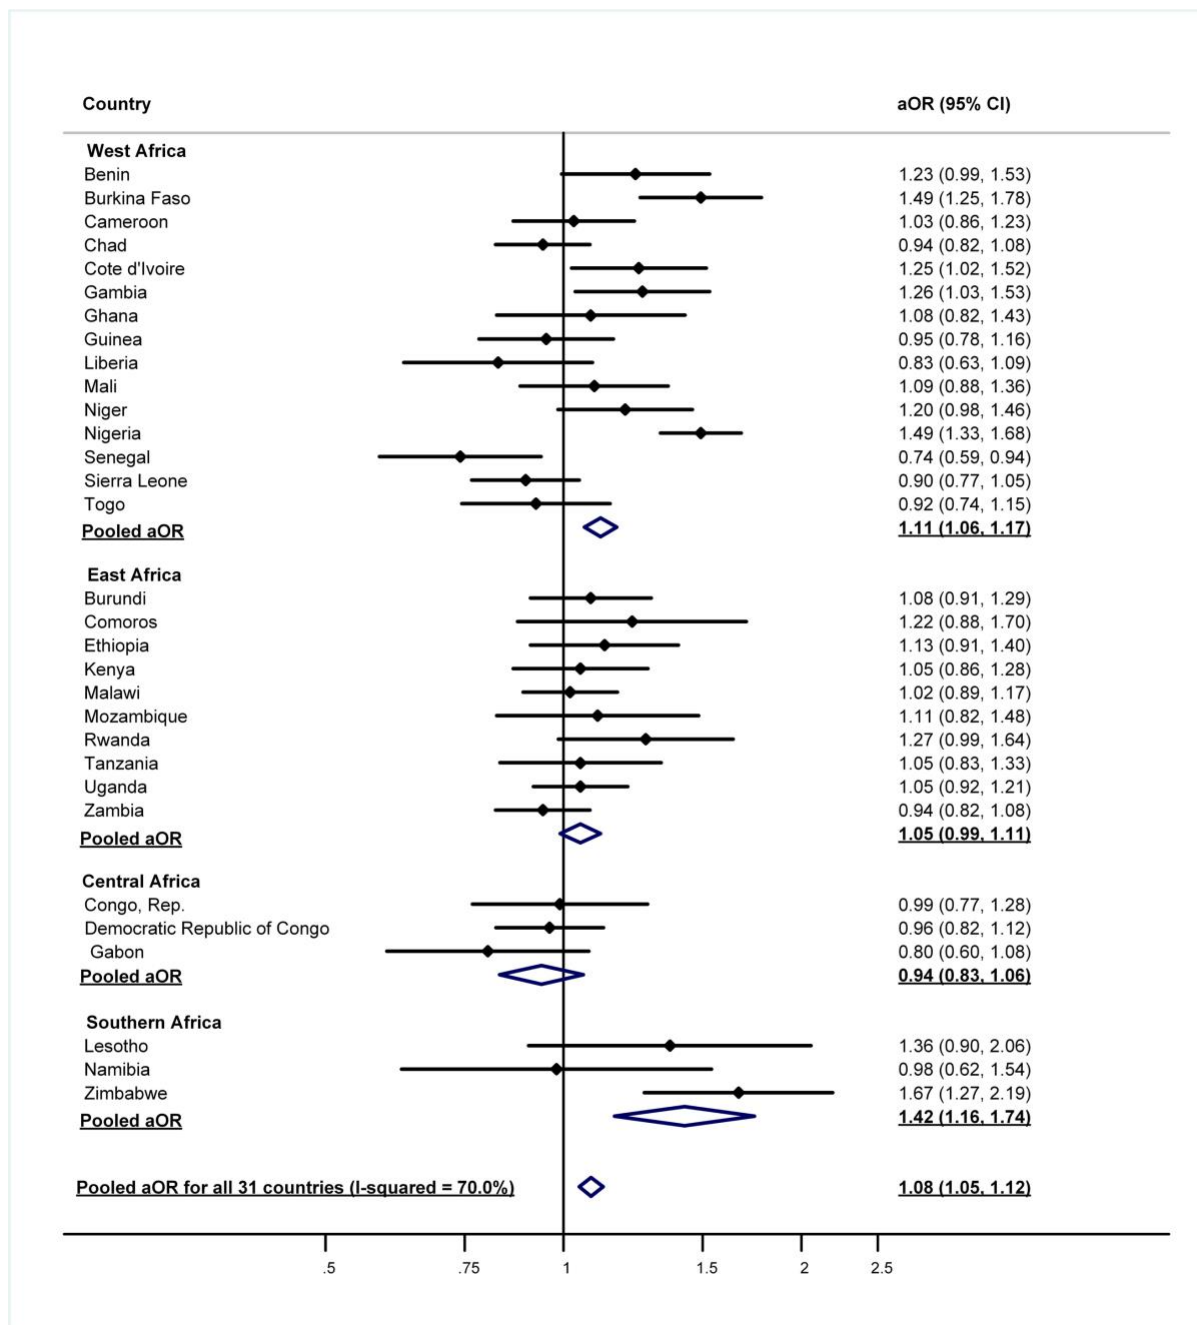

aOR = adjusted odd ratios for: place of residence, women age at married or cohabitation, education attainment, household wealth index, and working status

**Figure 7: The association between women autonomy (decision making on major household purchases) and utilisation of SBAs in 31 sub-Saharan African countries, 2010-2016.**

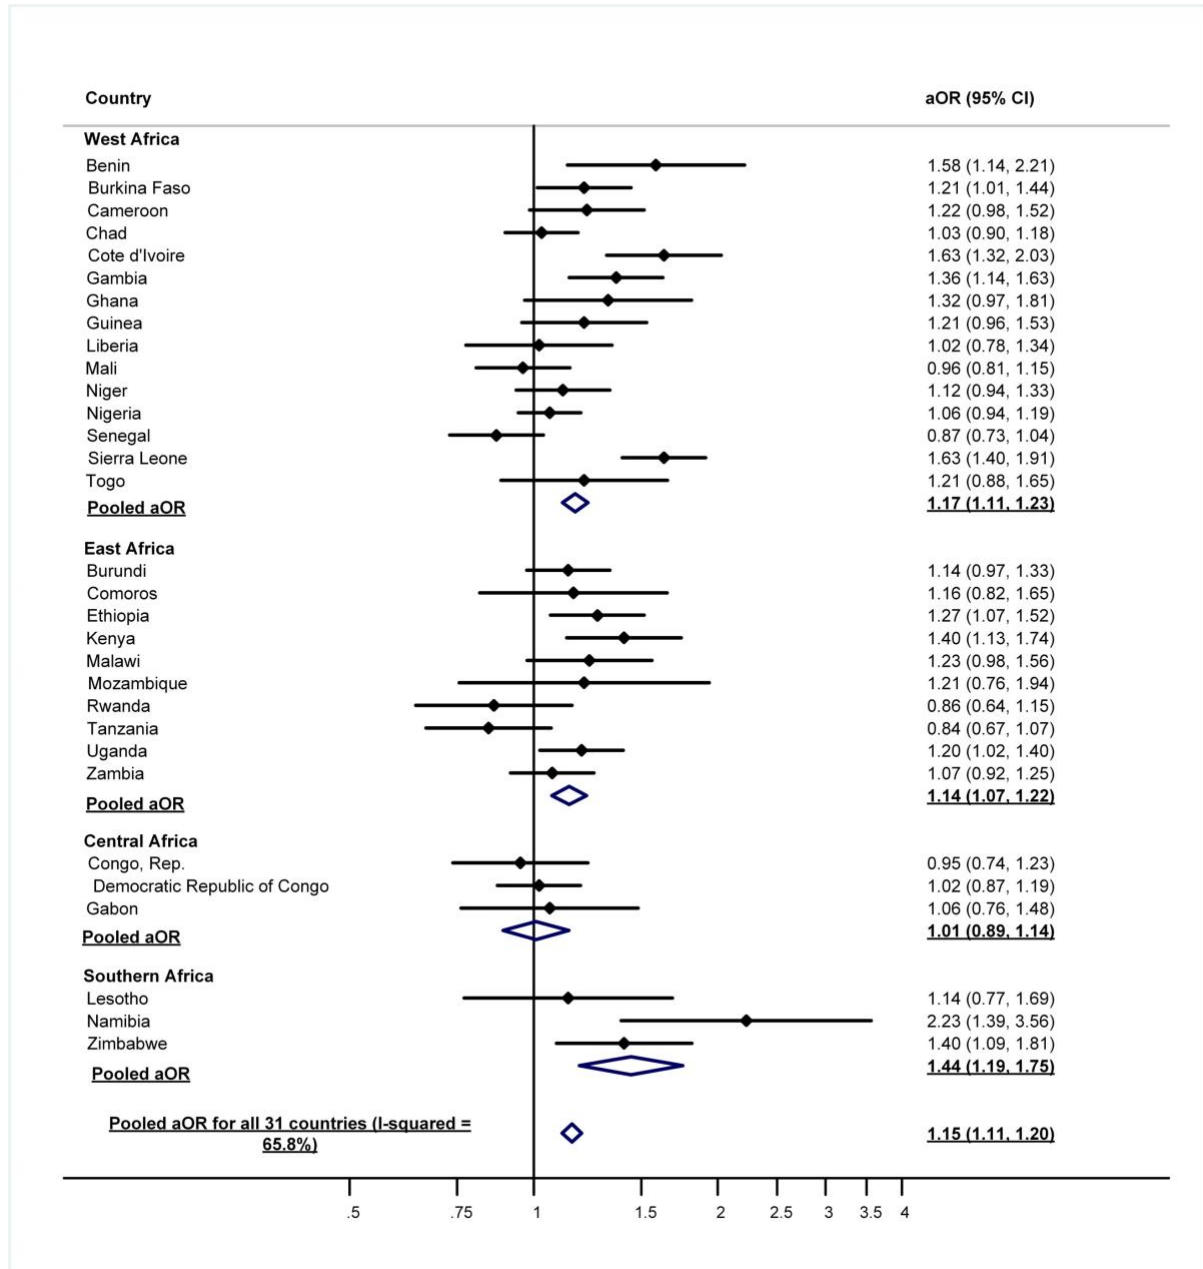

aOR = adjusted odd ratios for: place of residence, women age at married or cohabitation, education attainment, household wealth index, and working status

**Figure 8: The association between women autonomy (opposing sexual violence) and utilisation of SBAs in 31 sub-Saharan African countries, 2010-2016.**



STROBE Statement—Checklist of items that should be included in reports of *cross-sectional studies*:

NOTE: We used data from 31 separate Demographic and Health Surveys from publicly accessible databases. Hence, several items are not relevant or not available.

|                           | Item No | Recommendation                                                                                                                                                                       | Reported on page no.                                                                              |
|---------------------------|---------|--------------------------------------------------------------------------------------------------------------------------------------------------------------------------------------|---------------------------------------------------------------------------------------------------|
| <b>Title and abstract</b> | 1       | (a) Indicate the study's design with a used term in the title or the abstract                                                                                                        | Page 1, lines 1-3 & Page 2, line 22-36                                                            |
|                           |         | (b) Provide in the abstract an informative and balanced summary of what was done and what was found                                                                                  | Page 2,3, lines 20-48                                                                             |
| <b>Introduction</b>       |         |                                                                                                                                                                                      |                                                                                                   |
| Background/rationale      | 2       | Explain the scientific background and rationale for the investigation being reported                                                                                                 | Page 4-5, lines 61-86                                                                             |
| Objectives                | 3       | State specific objectives, including any prespecified hypotheses                                                                                                                     | Page 5, lines 86-88                                                                               |
| <b>Methods</b>            |         |                                                                                                                                                                                      |                                                                                                   |
| Study design              | 4       | Present key elements of study design early in the paper                                                                                                                              | Page 5-6, lines 90-113                                                                            |
| Setting                   | 5       | Describe the setting, locations, and relevant dates, including periods of recruitment, exposure, follow-up, and data collection                                                      | Page 5-6, lines 103-111                                                                           |
| Participants              | 6       | (a) Give the eligibility criteria, and the sources and methods of selection of participants                                                                                          | Page 5,6, lines 97-113                                                                            |
| Variables                 | 7       | Clearly define all outcomes, exposures, predictors, potential confounders, and effect modifiers. Give diagnostic criteria, if applicable                                             | Page 6-7, line 114-150                                                                            |
| Data sources/measurement  | 8*      | For each variable of interest, give sources of data and details of methods of assessment (measurement). Describe comparability of assessment methods if there is more than one group | Page 5, lines 103-104                                                                             |
| Bias                      | 9       | Describe any efforts to address potential sources of bias                                                                                                                            | We adjusted for five potential cofounders Page 7, lines 146-150                                   |
| Study size                | 10      | Explain how the study size was arrived at                                                                                                                                            | N/A                                                                                               |
| Quantitative variables    | 11      | Explain how quantitative variables were handled in the analyses. If applicable, describe which groupings were chosen and why                                                         | Page 6-7, lines 114-150.                                                                          |
| Statistical methods       | 12      | (a) Describe all statistical methods, including those used to control for confounding                                                                                                | Page 7-8, lines 151-178                                                                           |
|                           |         | (b) Describe any methods used to examine subgroups and interactions                                                                                                                  | We conducted subgroup analyses (Figures 1-8 and Table 1). However, no interactions were examined. |

|                          |     |                                                                                                                                                                                                                |                                            |
|--------------------------|-----|----------------------------------------------------------------------------------------------------------------------------------------------------------------------------------------------------------------|--------------------------------------------|
|                          |     | (c) Explain how missing data were addressed                                                                                                                                                                    | N/A                                        |
|                          |     | (d) If applicable, describe analytical methods taking account of sampling strategy                                                                                                                             | Page 8, Lines 155-157                      |
|                          |     | (e) Describe any sensitivity analyses                                                                                                                                                                          | N/A                                        |
| <b>Results</b>           |     |                                                                                                                                                                                                                |                                            |
| Participants             | 13* | (a) Report numbers of individuals at each stage of study—eg numbers potentially eligible, examined for eligibility, confirmed eligible, included in the study, completing follow-up, and analysed              | Page 9, line 182                           |
|                          |     | (b) Give reasons for non-participation at each stage                                                                                                                                                           | N/A                                        |
|                          |     | (c) Consider use of a flow diagram                                                                                                                                                                             | N/A                                        |
| Descriptive data         | 14* | (a) Give characteristics of study participants (eg demographic, clinical, social) and information on exposures and potential confounders                                                                       | Table 1 (page 10-15), Page 9, line 182-191 |
|                          |     | (b) Indicate number of participants with missing data for each variable of interest                                                                                                                            | N/A                                        |
| Outcome data             | 15* | Report numbers of outcome events or summary measures                                                                                                                                                           | N/A                                        |
| Main results             | 16  | (a) Give unadjusted estimates and, if applicable, confounder-adjusted estimates and their precision (e.g., 95% confidence interval). Make clear which confounders were adjusted for and why they were included | Figures 1-8                                |
|                          |     | (b) Report category boundaries when continuous variables were categorized                                                                                                                                      | N/A                                        |
|                          |     | (c) If relevant, consider translating estimates of relative risk into absolute risk for a meaningful time period                                                                                               | N/A                                        |
| Other analyses           | 17  | Report other analyses done—eg analyses of subgroups and interactions, and sensitivity analyses                                                                                                                 | Figures 1-8                                |
| <b>Discussion</b>        |     |                                                                                                                                                                                                                |                                            |
| Key results              | 18  | Summarise key results with reference to study objectives                                                                                                                                                       | Page 17, line 28 -34                       |
| Limitations              | 19  | Discuss limitations of the study, considering sources of potential bias or imprecision. Discuss both direction and magnitude of any potential bias                                                             | Page 19 lines 81-98                        |
| Interpretation           | 20  | Give a cautious overall interpretation of results considering objectives, limitations, multiplicity of analyses, results from similar studies, and other relevant evidence                                     | Page 17-18 lines 35-80                     |
| Generalisability         | 21  | Discuss the generalisability (external validity) of the study results                                                                                                                                          | Page 20, line 100-110                      |
| <b>Other information</b> |     |                                                                                                                                                                                                                |                                            |
| Funding                  | 22  | Give the source of funding and the role of the funders for the present study and, if applicable, for the original study on which the present article is based                                                  | N/A                                        |
